# Supplementary material for: Maternal PlGF and umbilical Dopplers predict pregnancy outcomes at diagnosis of early-onset fetal growth restriction
Source: JCI journal article supplement (doi:10.1172/jci169199), 2023-09-14
Supplement: sd1 [file 1]

# Supplementary data

## Contents of Supplementary Data

### Results

|                                                                                                                                                                                                                                                                                                                                                                                                      |    |
|------------------------------------------------------------------------------------------------------------------------------------------------------------------------------------------------------------------------------------------------------------------------------------------------------------------------------------------------------------------------------------------------------|----|
| Table 1: Recruitment by study centre for the discovery and validation sets.....                                                                                                                                                                                                                                                                                                                      | 4  |
| Table 2: Core maternal and neonatal outcomes recommended for reporting by the COSGROVE (Core Outcome Set for the prevention and treatment of fetal GROWth restriction: deVeloPping Endpoints) consensus process.....                                                                                                                                                                                 | 4  |
| Figure 1: Gestational age range from enrolment to either live birth or diagnosis of intrauterine fetal death for all participants, sorted by gestational age at enrolment. ....                                                                                                                                                                                                                      | 5  |
| Table 3: Associations between ultrasound measurements at enrolment and fetal or neonatal death and death or delivery $\leq 28+0$ weeks of gestation in the discovery set.....                                                                                                                                                                                                                        | 6  |
| Table 4: Associations between ultrasound measurements at enrolment and (1) fetal or neonatal death and (2) death or delivery $\leq 28+0$ weeks of gestation in the combined discovery and validation sets. ....                                                                                                                                                                                      | 7  |
| Table 5: Abbreviations and full names of proteins from main article figures. ....                                                                                                                                                                                                                                                                                                                    | 8  |
| Figure 2: Dendrogram to accompany network analysis for pregnancies ending in fetal or neonatal death versus livebirths surviving to 29 days of life, based on edge betweenness analysis. ....                                                                                                                                                                                                        | 10 |
| Figure 3: Dendrogram to accompany network analysis for pregnancies ending in fetal death or delivery $\leq 28+0$ weeks of gestation versus continuation of pregnancy beyond $28+0$ weeks, based on edge betweenness analysis. ....                                                                                                                                                                   | 11 |
| Figure 4: Network analysis for pregnancies that developed an abnormal Uma pulsatility index $>95^{\text{th}}$ centile versus those that did not. (A) Parenclitic protein network and clustering (B) Dendrogram, based on edge betweenness analysis. ....                                                                                                                                             | 12 |
| Figure 5: Network analysis for pregnancies with slow fetal growth versus those without slow fetal growth. (A) Parenclitic protein network and clustering (B) Dendrogram, based on edge betweenness analysis. Slow fetal growth was defined as a worsening of weight deviation of $>10$ percentage points over a two-week interval or equivalent trajectory over a longer period (Marsal, 2009). .... | 13 |
| Table 6: Experience and geographical origin of the 45 clinicians completing the marker priority survey.....                                                                                                                                                                                                                                                                                          | 15 |
| Figure 6: (A) The perceived importance of predicting term livebirth to patients, clinicians for the purpose of pregnancy management and clinicians for the purpose of patient counselling. (B) the proportion of respondents who prioritised either sensitivity or specificity for each pregnancy outcome.....                                                                                       | 15 |
| Table 7: Models significantly improved by the addition of gestational age or pre-eclampsia at enrolment. Likelihood ratio (LR) tests, Akaike information criteria (AIC) and Schwarz's Bayesian information criteria (BIC) showing the effects of the added variables. ....                                                                                                                           | 16 |
| Table 8: Details of the validated models to predict fetal or neonatal death. Constants and coefficients for calculating log(odds) provided, along with variable cut points that give the maximum positive likelihood ratio (LR+), maximum correct classification and minimum negative likelihood ratio (LR-). ....                                                                                   | 17 |
| Table 9: Details of the validated models to predict death or delivery $\leq 28+0$ weeks of gestation. Constants and coefficients for calculating log(odds) and variable cut points that give the maximum positive likelihood ratio (LR+), maximum correct classification and minimum negative likelihood ratio (LR-). ....                                                                           | 18 |
| Table 10: Details of the validated models to predict development of umbilical artery pulsatility index $>95^{\text{th}}$ centile. Constants and coefficients for calculating log(odds) provided, along with variable                                                                                                                                                                                 |    |

|                                                                                                                                                                                                                                                                                                                                                                                                                                                                                                                                                                                                                                                                          |    |
|--------------------------------------------------------------------------------------------------------------------------------------------------------------------------------------------------------------------------------------------------------------------------------------------------------------------------------------------------------------------------------------------------------------------------------------------------------------------------------------------------------------------------------------------------------------------------------------------------------------------------------------------------------------------------|----|
| cut points that give the maximum positive likelihood ratio (LR+), maximum correct classification and minimum negative likelihood ratio (LR-). .....                                                                                                                                                                                                                                                                                                                                                                                                                                                                                                                      | 19 |
| Figure 7: Calibration plots for the models in Tables 8 and 9. ....                                                                                                                                                                                                                                                                                                                                                                                                                                                                                                                                                                                                       | 20 |
| Figure 8: The differences between estimated fetal weights (EFWs) generated using the Intergrowth formula (Stirneemann et al., 2017) and the Hadlock 3 formula (Hadlock et al., 1985) and birthweight (BW) for livebirths with an EFW performed within seven days of delivery. (A) Absolute differences for n=21 pregnancies with a BW <600g (B) percentage difference, as a percentage of BW, for n=21 pregnancies with a BW <600g (C) absolute differences for all n=67 pregnancies (D) percentage difference, as a percentage of BW, for all n=67 pregnancies. ....                                                                                                    | 24 |
| Figure 9: Calibration plots showing (A) the effect of using the estimated fetal weight calculated with the Hadlock 3 formula and z-score from the Marsal reference chart in the model generated from the Intergrowth z-score, and (B) the effect of using the Intergrowth z-score in the model generated from the Hadlock 3 formula estimated fetal weight z-score from the Marsal chart. 25                                                                                                                                                                                                                                                                             | 25 |
| Table 11: Proteins showing an association with pregnancy outcomes at a Benjamini Hochberg 5% false discovery rate and Benjamini Hochberg 1% false discovery rate in centered and scaled data from the combined discovery and validation sets. ....                                                                                                                                                                                                                                                                                                                                                                                                                       | 26 |
| Figure 10: Volcano plots showing the statistical significance and magnitude of associations between the centred and scaled concentrations of the 93 proteins from the discovery and validation sets and (A) the development of abnormal umbilical artery (UmA) Dopplers (pulsatility index >95 <sup>th</sup> centile) (B) slow fetal growth (a worsening of weight deviation of $\geq 10$ percentage points over a two-week interval).....                                                                                                                                                                                                                               | 27 |
| Table 12: Top three three-variable and top two-variable models for predicting fetal or neonatal death, death or delivery $\leq 28+0$ weeks of gestation and the development of abnormal umbilical artery (UmA) Dopplers from the combined data set. Leave-one-out cross-validated models generated using centred and scaled values and evaluated on the basis of geometric mean of receiver operating characteristic curve area under the curve (AUC), precision-recall ROC area under the curve (PRROC), Matthews correlation coefficient (MCC) and F <sub>1</sub> rankings, excluding models with variance inflation factors (VIFs) of five or more (see Methods)..... | 28 |
| Table 13: Protein and ultrasound measurements at enrolment showing a significant association with gestational age at livebirth or diagnosis of fetal death and/or interval between enrolment and livebirth or diagnosis of fetal death at a Benjamini-Hochberg 1% false discovery rate. ....                                                                                                                                                                                                                                                                                                                                                                             | 29 |
| Figure 11: (A) Predicted versus actual gestational age of either livebirth or diagnosis of fetal death, based on the sparser model containing PIGF and sFLT1 concentration and umbilical artery Doppler category (B) Predicted versus actual interval from enrolment to either livebirth or diagnosis of fetal death, based on the sparser model containing PIGF and sFLT1 concentrations, umbilical artery Doppler category and gestational age at enrolment. ....                                                                                                                                                                                                      | 29 |
| Table 14: Comparison of the maternal and pregnancy characteristics of participants with and without samples available for placental histological classification.....                                                                                                                                                                                                                                                                                                                                                                                                                                                                                                     | 30 |
| Table 15: Pregnancy outcome by Amsterdam consensus placental classification (Khong et al., 2016) for the 55 pregnancies with available placental histology samples. ....                                                                                                                                                                                                                                                                                                                                                                                                                                                                                                 | 30 |
| Table 16: Associations between ultrasound measurements and maternal serum protein concentrations at enrolment and subsequent placental classification of (1) any placental pathology (2) maternal vascular malperfusion (MVM) according to the Amsterdam consensus criteria (Khong et al., 2016). ....                                                                                                                                                                                                                                                                                                                                                                   | 31 |
| Equation 1: Hadlock 3 EFW formula (Hadlock et al., 1985).....                                                                                                                                                                                                                                                                                                                                                                                                                                                                                                                                                                                                            | 32 |
| Equation 2: Marsal EFW z-score (Marsal et al., 1996).....                                                                                                                                                                                                                                                                                                                                                                                                                                                                                                                                                                                                                | 32 |
| Equation 3: Percentage weight deviation (Marsal, 2009) .....                                                                                                                                                                                                                                                                                                                                                                                                                                                                                                                                                                                                             | 32 |
| Equation 4: Intergrowth EFW formula (Stirneemann et al., 2017) .....                                                                                                                                                                                                                                                                                                                                                                                                                                                                                                                                                                                                     | 32 |
| Equation 5: Intergrowth z-score formula (Stirneemann et al., 2017) .....                                                                                                                                                                                                                                                                                                                                                                                                                                                                                                                                                                                                 | 33 |
| Table 17: Full list of proteins measured by the Olink Proseek® Multiplex cardiovascular disease (CVD) II proximity extension assay with reported intra-assay variation .....                                                                                                                                                                                                                                                                                                                                                                                                                                                                                             | 33 |

|                                                                                                                                                                    |    |
|--------------------------------------------------------------------------------------------------------------------------------------------------------------------|----|
| Table 18: The scoring system for ranking proteins identified through pooled mass spectrometry....                                                                  | 35 |
| Table 19: Top 50 highest scoring proteins identified from pooled serum liquid chromatography and tandem mass spectrometry, based on the scoring system above. .... | 36 |
| Table 20: Combinations of proteins included in different sections of the study .....                                                                               | 38 |
| Table 21: Marker priority survey questions for clinicians and patients .....                                                                                       | 39 |

## Results

Table 1: Recruitment by study centre for the discovery and validation sets.

| Centre                                                   | Discovery (n %) | Validation (n %) | Combined (n %) |
|----------------------------------------------------------|-----------------|------------------|----------------|
| University College London Hospital, UK                   | 48 (76)         | 52 (87)          | 100 (81)       |
| Maternal-Fetal Unit Hospital Clinic<br>Barcelona, Spain  | 6 (10)          | 4 (7)            | 10 (8)         |
| University Medical Center Hamburg-<br>Eppendorf, Germany | 5 (8)           | 2 (3)            | 7 (6)          |
| Skane University Hospital, Lund, Sweden                  | 4 (6)           | 2 (3)            | 6 (5)          |

Table 2: Core maternal and neonatal outcomes recommended for reporting by the COSGROVE (Core Outcome Set for the prevention and treatment of fetal GROwth restriction: deVeloping Endpoints) consensus process. Childhood outcomes at 2 years of age are still being assessed and will be reported in due course.

| Domain              | Outcome                                                 |                |
|---------------------|---------------------------------------------------------|----------------|
| Maternal<br>(n=123) | Eclampsia (n)                                           | 0              |
|                     | Maternal death (n)                                      | 0              |
| Neonatal<br>(n=90)  | Birthweight (g, median IQR)                             | 953 (590-1650) |
|                     | Birthweight <3 <sup>rd</sup> centile (n %)              | 83 (92%)       |
|                     | Birthweight <10 <sup>th</sup> centile (n %)             | 88 (98%)       |
|                     | Need for mechanical ventilation (n %)                   | 66 (73%)       |
|                     | Bronchopulmonary dysplasia / chronic lung disease (n%)* | 47 (59%)       |
|                     | Necrotising enterocolitis (n %)                         | 10 (11%)       |

\*n=9 neonatal deaths before 36 weeks corrected age, n=2 missing.

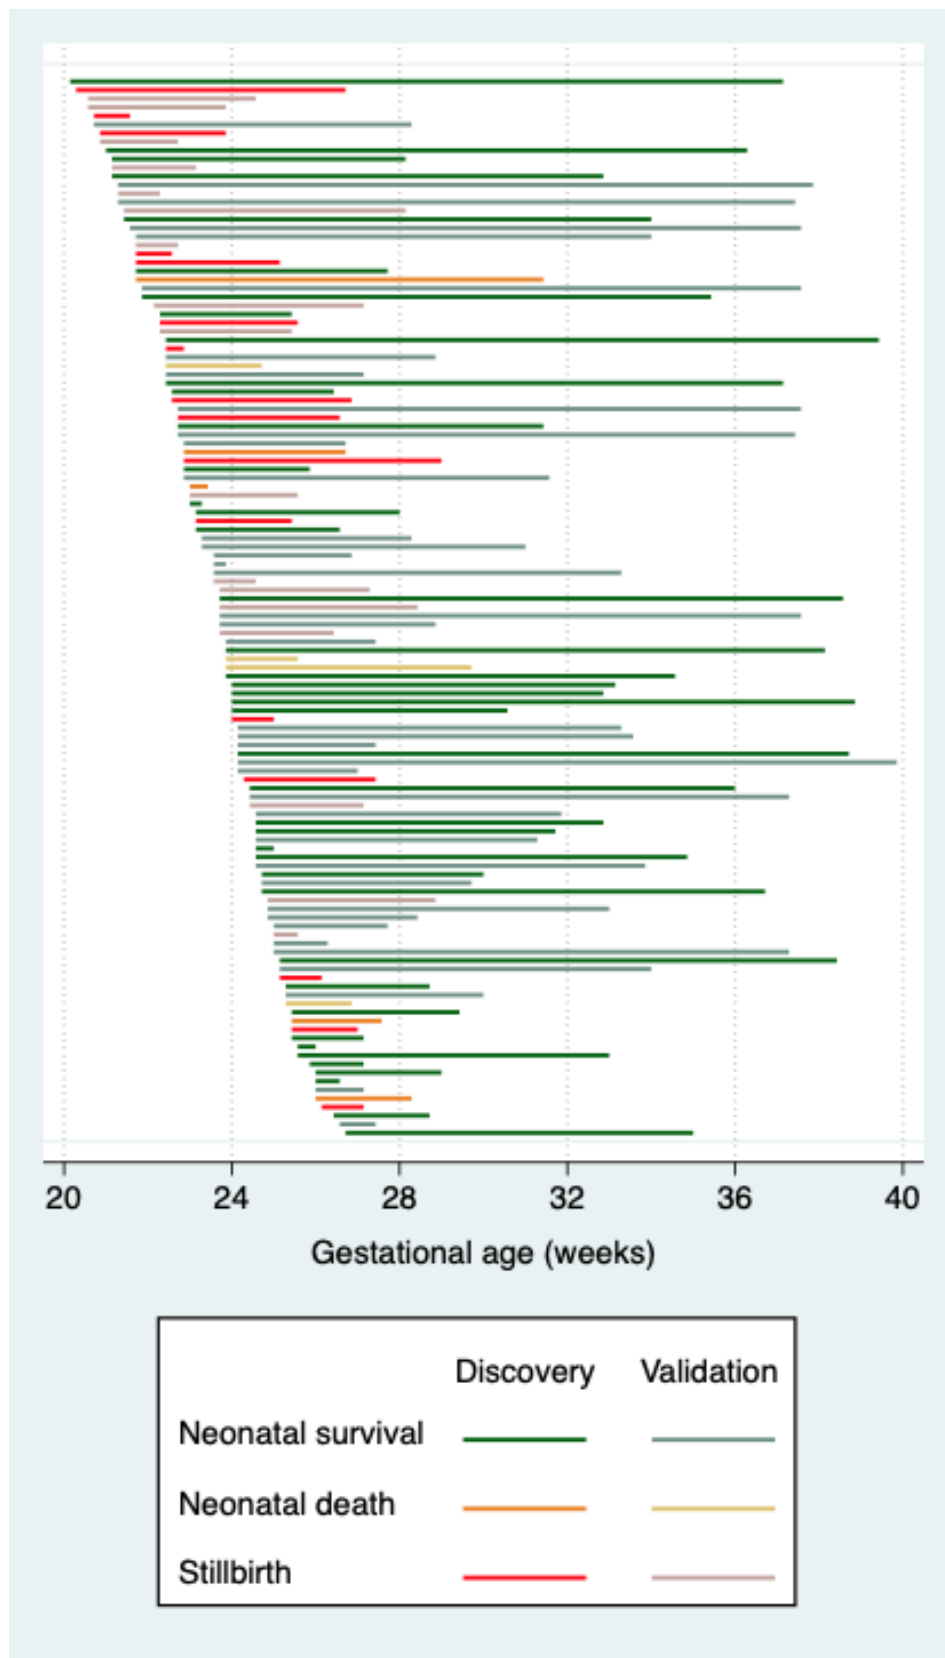

Figure 1: Gestational age range from enrolment to either live birth or diagnosis of intrauterine fetal death for all participants, sorted by gestational age at enrolment.

Table 3: Associations between ultrasound measurements at enrolment and fetal or neonatal death and death or delivery  $\leq 28+0$  weeks of gestation in the discovery set.

| Ultrasound variables                                                  |      | Fetal or neonatal death |         |                     |                     | Death or delivery $\leq 28+0$ weeks of gestation |         |                     |                     |
|-----------------------------------------------------------------------|------|-------------------------|---------|---------------------|---------------------|--------------------------------------------------|---------|---------------------|---------------------|
|                                                                       |      | OR<br>(95% CI)          | p value | RR<br>(95% CI)      | AUC<br>(95% CI)     | OR<br>(95% CI)                                   | p value | RR<br>(95% CI)      | AUC<br>(95% CI)     |
| UmA PI >95 <sup>th</sup> centile (Schaffer and Staudach, 1997)        | n=63 | 5.2<br>(1.6-17.0)       | 0.006   | 3.1<br>(1.4-8.5)    | 0.69<br>(0.57-0.81) | 8.8<br>(2.8-27.4)                                | 0.0002  | 3.2<br>(1.4-7.4)    | 0.75<br>(0.64-0.86) |
| Absent or reversed UmA EDF                                            | n=63 | 5.5<br>(1.7-17.9)       | 0.005   | 2.8<br>(1.7-6.5)    | 0.68<br>(0.55-0.80) | 17.7<br>(3.6-87.7)                               | 0.0004  | 2.9<br>(1.4-5.9)    | 0.74<br>(0.64-0.84) |
| UmA category <sup>1</sup>                                             | n=63 | 2.8<br>(1.6-5.2)        | 0.001   | 1.8<br>(1.2-2.6)    | 0.75<br>(0.62-0.88) | 4.4<br>(2.1-9.3)                                 | 0.0001  | 1.7<br>(1.2-2.3)    | 0.80<br>(0.70-0.91) |
| MCA PI <5 <sup>th</sup> centile (Schaffer and Staudach, 1997)         | n=58 | 1.3<br>(0.3-5.4)        | 0.69    | 1.2<br>(0.4-3.6)    |                     | 2.8<br>(0.64-12.0)                               | 0.18    | 1.5<br>(0.7-3.6)    |                     |
| Absent or reversed DV a wave                                          | n=60 | 10.7<br>(1.1-103.3)     | 0.04    | 2.9<br>(1.0-8.8)    | 0.59<br>(0.50-0.69) | 4.8<br>(0.50-45.8)                               | 0.18    | 1.8<br>(0.6-5.1)    |                     |
| Mean UtA PI                                                           | n=62 | 1.7<br>(0.7-4.1)        | 0.23    | 1.4<br>(0.7-2.8)    |                     | 6.4<br>(2.1-19.3)                                | 0.001   | 2.1<br>(1.2-3.8)    | 0.77<br>(0.65-0.89) |
| Mean UtA PI >95 <sup>th</sup> centile (Schaffer and Staudach, 1997)   | n=62 | 1.8<br>(0.4-7.3)        | 0.43    | 1.5<br>(0.4-5.1)    |                     | 1.4<br>(1.1-1.7)                                 | 0.002   | 7.4<br>(1.0-54.6)   | 0.76<br>(0.64-0.89) |
| EFW <sub>HM</sub> z-score (Hadlock et al., 1985, Marsal et al., 1996) | n=63 | 0.17<br>(0.06-0.45)     | 0.0003  | 0.56<br>(0.40-0.77) | 0.81<br>(0.69-0.93) | 0.35<br>(0.17-0.72)                              | 0.005   | 0.71<br>(0.52-0.95) | 0.69<br>(0.56-0.82) |
| EFW <sub>I</sub> z-score (Stirnemann et al., 2017)                    | n=63 | 0.37<br>(0.20-0.67)     | 0.001   | 0.80<br>(0.71-0.91) | 0.83<br>(0.71-0.95) | 0.54<br>(0.36-0.83)                              | 0.004   | 0.87<br>(0.77-0.97) | 0.73<br>(0.60-0.85) |
| Slow fetal growth <sup>2</sup>                                        | n=55 | 5.4<br>(1.4-19.8)       | 0.012   | 3.3<br>(1.1-10.4)   | 0.70<br>(0.56-0.83) | 2.6<br>(0.86-7.8)                                | 0.09    | 1.7<br>(0.8-4.0)    |                     |

<sup>1</sup>Four levels:  $\leq 95^{\text{th}}$  centile,  $>95^{\text{th}}$  centile with positive EDF, absent EDF, reversed EDF. <sup>2</sup>Slow fetal growth, defined as a worsening of percentage weight deviation by  $\geq 10$  percentage points over 2 weeks or equivalent (Marsal, 2009), was assessed over a minimum of 2 weeks so included data from follow-up scans. DV=ductus venosus, EDF=end-diastolic flow, EFW<sub>HM</sub>=estimated fetal weight calculated using Hadlock 3 formula with z-score calculated using Marsal reference chart, EFW<sub>I</sub>=estimated fetal weight and z-score calculated using Intergrowth formulae, MCA=middle cerebral artery, OR=odds ratio, PI=pulsatility index, RR=risk ratio (estimated using Poisson regression), UmA=umbilical artery, UtA=uterine artery.

Table 4: Associations between ultrasound measurements at enrolment and (1) fetal or neonatal death and (2) death or delivery  $\leq 28+0$  weeks of gestation in the combined discovery and validation sets. This is provided for reference but was not available at the time of model selection as models were selected prior to validation set recruitment.

| Ultrasound variable                                                   |       | Fetal or neonatal death |          |                     |                     | Death or delivery $\leq 28+0$ weeks of gestation |          |                     |                     |
|-----------------------------------------------------------------------|-------|-------------------------|----------|---------------------|---------------------|--------------------------------------------------|----------|---------------------|---------------------|
|                                                                       |       | OR<br>(95% CI)          | p value  | RR<br>(95% CI)      | AUC<br>(95% CI)     | OR<br>(95% CI)                                   | p value  | RR<br>(95% CI)      | AUC<br>(95% CI)     |
| UmA PI >95 <sup>th</sup> centile (Schaffer and Staudach, 1997)        | n=122 | 6.7<br>(2.7-16.9)       | 0.0001   | 3.9<br>(1.7-8.7)    | 0.70<br>(0.63-0.78) | 8.2<br>(3.5-18.8)                                | <0.00005 | 3.3<br>(1.7-6.4)    | 0.73<br>(0.66-0.81) |
| Absent or reversed UmA EDF                                            | n=122 | 6.5<br>(2.8-15.0)       | <0.00005 | 3.2<br>(1.7-6.0)    | 0.71<br>(0.63-0.80) | 14.2<br>(5.5-36.8)                               | <0.00005 | 3.1<br>(1.8-5.4)    | 0.76<br>(0.69-0.84) |
| UmA category <sup>1</sup>                                             | n=122 | 2.8<br>(1.1-4.2)        | <0.00005 | 1.8<br>(1.4-2.4)    | 0.77<br>(0.69-0.86) | 3.5<br>(2.2-5.6)                                 | <0.00005 | 1.7<br>(1.3-2.1)    | 0.80<br>(0.72-0.88) |
| MCA PI <5 <sup>th</sup> centile (Schaffer and Staudach, 1997)         | n=117 | 1.8<br>(0.64-5.10)      | 0.27     | 1.4<br>(0.66-3.1)   |                     | 2.2<br>(0.77-6.5)                                | 0.14     | 1.4<br>(0.74-2.8)   |                     |
| Absent or reversed DV a wave                                          | n=119 | 19.5<br>(2.3-162.3)     | 0.006    | 3.1<br>(1.4-6.6)    | 0.59<br>(0.53-0.66) | 4.4<br>(0.87-21.9)                               | 0.07     | 1.7<br>(0.79-3.9)   |                     |
| Mean UtA PI                                                           | n=122 | 2.3<br>(1.1-4.7)        | 0.017    | 1.7<br>(1.0-2.9)    | 0.64<br>(0.53-0.75) | 4.1<br>(1.9-8.6)                                 | 0.0002   | 1.9<br>(1.2-3.0)    | 0.72<br>(0.62-0.81) |
| Mean UtA PI >95 <sup>th</sup> centile (Schaffer and Staudach, 1997)   | n=122 | 2.2<br>(0.76-6.4)       | 0.15     | 1.8<br>(0.69-4.5)   |                     | 8.6<br>(2.4-30.7)                                | 0.0009   | 4.4<br>(1.4-14.1)   | 0.64<br>(0.57-0.70) |
| EFW <sub>HM</sub> z-score (Hadlock et al., 1985, Marsal et al., 1996) | n=123 | 0.11<br>(0.048-0.25)    | <0.00005 | 0.50<br>(0.39-0.65) | 0.85<br>(0.78-0.92) | 0.32<br>(0.18-0.56)                              | <0.00005 | 0.67<br>(0.52-0.86) | 0.64<br>(0.57-0.70) |
| EFW <sub>I</sub> z-score (Stirnemann et al., 2017)                    | n=123 | 0.29<br>(0.18-0.47)     | <0.00005 | 0.84<br>(0.79-0.90) | 0.87<br>(0.80-0.94) | 0.53<br>(0.39-0.71)                              | <0.00005 | 0.89<br>(0.83-0.96) | 0.74<br>(0.66-0.83) |
| Slow fetal growth <sup>2</sup>                                        | n=104 | 4.0<br>(1.68-9.74)      | 0.0018   | 2.6<br>(1.3-5.2)    | 0.67<br>(0.57-0.77) | 2.3<br>(1.0-5.1)                                 | 0.049    | 1.6<br>(0.87-3.0)   | 0.60<br>(0.50-0.70) |

<sup>1</sup>Four levels:  $\leq 95^{\text{th}}$  centile,  $>95^{\text{th}}$  centile with positive EDF, absent EDF, reversed EDF. <sup>2</sup>Slow fetal growth, defined as a worsening of percentage weight deviation by  $\geq 10$  percentage points over 2 weeks or equivalent (Marsal, 2009), was assessed over a minimum of 2 weeks so included data from follow-up scans. DV=ductus venosus, EDF=end-diastolic flow, EFW<sub>HM</sub>=estimated fetal weight calculated using Hadlock 3 formula with z-score calculated using Marsal reference chart, EFW<sub>I</sub>=estimated fetal weight and z-score calculated using Intergrowth formulae, MCA=middle cerebral artery, OR=odds ratio, PI=pulsatility index, RR=risk ratio (estimated using Poisson regression), UmA=umbilical artery, UtA=uterine artery.

Table 5: Abbreviations and full names of proteins from main article figures.

| Abbreviation | Full protein name                                                 | Figure |   |   |   |   |
|--------------|-------------------------------------------------------------------|--------|---|---|---|---|
|              |                                                                   | 2      | 3 | 7 | 8 | 9 |
| ACE2         | Angiotensin-converting enzyme 2                                   |        | x |   |   |   |
| ADAMTS13     | A disintegrin and metalloproteinase with thrombospondin motifs 13 |        | x |   |   |   |
| ADM          | Pro-adrenomedullin                                                |        | x | x |   |   |
| AGRP         | Agouti-related protein                                            |        | x |   |   |   |
| AMBP         | Protein AMBP                                                      |        |   |   |   | x |
| ANGPT1       | Angiopoietin 1                                                    |        | x |   |   |   |
| BOC          | Brother of cysteine dioxygenase                                   | x      | x |   |   |   |
| CA5A         | Carbonic anhydrase 5A, mitochondrial                              |        | x |   |   | x |
| CALCA        | Calcitonin                                                        |        |   |   | x |   |
| CALCRL       | Calcitonin gene-related peptide type 1 receptor                   |        |   |   | x |   |
| CD40L        | CD40 ligand                                                       |        | x |   |   | x |
| CD47         | Leucocyte surface antigen CD47                                    |        |   |   | x |   |
| CEACAM8      | Carcinoembryonic antigen related cell adhesion molecule 8         |        | x |   |   |   |
| CHD5         | Chromodomain-helicase-DNA-binding protein 5                       |        |   |   | x |   |
| CSH / HPL    | Chorionic somatomammotropin hormone / human placental lactogen    | x      | x | x | x | x |
| CTRC         | Chymotrypsin C                                                    |        | x |   |   |   |
| CTSL1        | Cathepsin L1                                                      |        | x |   |   |   |
| DCN          | Decorin                                                           |        | x |   |   | x |
| DECR1        | 2,4-dienoyl-CoA reductase, mitochondrial                          |        | x |   |   |   |
| DKK1         | Dickkopf-related protein 1                                        |        | x |   |   |   |
| FABP2        | Fatty acid-binding protein, intestinal                            | x      | x |   |   |   |
| FGF21        | Fibroblast growth factor 21                                       | x      | x |   |   | x |
| FGF23        | Fibroblast growth factor 23                                       |        | x |   |   |   |
| FN           | Fibronectin                                                       |        |   |   |   | x |
| FST          | Follistatin                                                       | x      |   |   |   | x |
| GDF2         | Growth/differentiation factor 2                                   |        | x |   |   | x |
| GH1          | Growth hormone                                                    |        | x | x |   | x |
| GHR          | Growth hormone receptor                                           |        |   |   | x |   |
| GT / FABP6   | Gastrotropin                                                      |        | x |   |   |   |
| HAO1         | Hydroxyacid oxidase 1                                             |        |   | x |   | x |
| HAVCR1       | Hepatitis A virus cellular receptor 1                             |        | x |   |   |   |
| IKBKG        | Inhibitor of nuclear factor kappa B kinase regulatory subunit G   |        | x |   |   |   |
| IL1RA        | Interleukin 1 receptor antagonist protein                         | x      |   |   |   |   |
| IL1RL2       | Interleukin 1 receptor-like 2                                     | x      | x |   |   | x |
| IL4RA        | Interleukin 4 receptor subunit alpha                              |        |   |   |   |   |
| IL6          | Interleukin 6                                                     | x      |   |   |   |   |
| IL16         | Pro-interleukin 16                                                |        | x |   |   |   |
| IL17D        | Interleukin 17D                                                   |        | x | x |   | x |
| IL18         | Interleukin 18                                                    |        | x |   |   |   |
| IL27         | Interleukin 27                                                    |        | x |   |   |   |
| JAK2         | Tyrosine-protein kinase JAK2                                      |        |   |   | x |   |
| LEP          | Leptin                                                            |        | x |   |   |   |
| LGALS9       | Galectin 9                                                        | x      |   |   |   | x |
| LNPEP        | Leucyl-cystinyl aminopeptidase                                    |        | x |   |   |   |
| MARCO        | Macrophage receptor with collagenous structure                    | x      | x | x |   |   |
| MMP12        | Matrix metalloproteinase 12                                       | x      | x |   |   | x |
| NRP1         | Neuropilin 1                                                      | x      | x |   | x |   |
| OLR1         | Oxidized low density lipoprotein receptor 1                       | x      | x |   |   | x |
| OSCAR        | Osteoclast-associated immunoglobulin-like receptor                |        | x |   |   |   |
| PAPPA        | Pappalysin-1 / pregnancy-associated plasma protein A              | x      | x |   |   |   |
| PAR1         | Proteinase-activated receptor 1                                   |        | x |   |   |   |



|           |                                                       |   |   |   |   |   |
|-----------|-------------------------------------------------------|---|---|---|---|---|
| PDGFB     | Platelet-derived growth factor subunit B              | x | x |   |   |   |
| PDCD1LG2  | Programmed cell death 1 ligand 2                      | x | x |   |   | x |
| PIGF      | Placental growth factor                               | x | x | x |   | x |
| PLXNA1    | Plexin-A1                                             |   |   |   | x |   |
| PRELP     | Prolargin                                             |   | x |   |   |   |
| PRSS8     | Serine protease 8                                     |   | x |   |   |   |
| PRSS27    | Serine protease 27                                    |   | x |   |   |   |
| PSG1      | Pregnancy-specific beta-glycoprotein 1                | x |   | x |   | x |
| PTX3      | Pentraxin-related protein PTX3                        |   | x |   |   |   |
| RAGE      | Receptor for advanced glycosylation end products      |   | x |   |   |   |
| RAMP1     | Receptor activity-modifying protein 1                 |   |   |   | x |   |
| RAMP2     | Receptor activity-modifying protein 2                 |   |   |   | x |   |
| RAMP3     | Receptor activity-modifying protein 3                 |   |   |   | x |   |
| REN       | Renin                                                 |   | x |   |   |   |
| SCF       | Stem cell factor                                      |   | x |   |   |   |
| SEMA3A    | Semaphorin 3A                                         |   |   |   | x |   |
| SERPINA12 | Serpin A12                                            |   | x |   |   |   |
| sFLT1     | Soluble fms-like tyrosine kinase 1                    |   |   |   | x | x |
| SH2D2A    | SH2 domain-containing protein 2A                      |   |   |   | x |   |
| SIRPG     | Signal-regulatory protein gamma                       |   |   |   | x |   |
| SOD2      | Superoxide dismutase 2                                |   | x |   |   |   |
| SPON2     | Spondin 2                                             |   | x |   |   |   |
| SRC       | Proto-oncogene tyrosine-protein kinase SRC            |   | x |   |   |   |
| STK4      | Serine/threonine-protein kinase 4                     | x | x |   |   |   |
| TF        | Tissue factor                                         |   | x |   |   |   |
| TGM2      | Protein-glutamine gamma-glutamyltransferase 2         |   | x |   |   |   |
| THBS1     | Thrombospondin 1                                      |   |   |   | x |   |
| THBS2     | Thrombospondin 2                                      | x | x | x |   | x |
| TIE2      | Angiopoietin 1 receptor                               |   | x |   |   |   |
| TM        | Thrombomodulin                                        |   | x |   |   |   |
| TNFRSF10A | Tumor necrosis factor receptor superfamily member 10A |   |   |   |   | x |
| TNFRSF10B | Tumor necrosis factor receptor superfamily member 10B |   | x |   |   | x |
| TNFRSF11A | Tumor necrosis factor receptor superfamily member 11A |   | x |   |   |   |
| VEGFB     | Vascular endothelial growth factor B                  |   |   |   | x |   |
| VEGFD     | Vascular endothelial growth factor D                  |   |   |   | x |   |
| VEGFR2    | Vascular endothelial growth factor receptor 2         | x | x |   | x |   |
| VSIG2     | V-set and immunoglobulin domain-containing protein 2  |   | x |   |   |   |
| XCL1      | Lymphotoxin                                           | x |   |   |   |   |

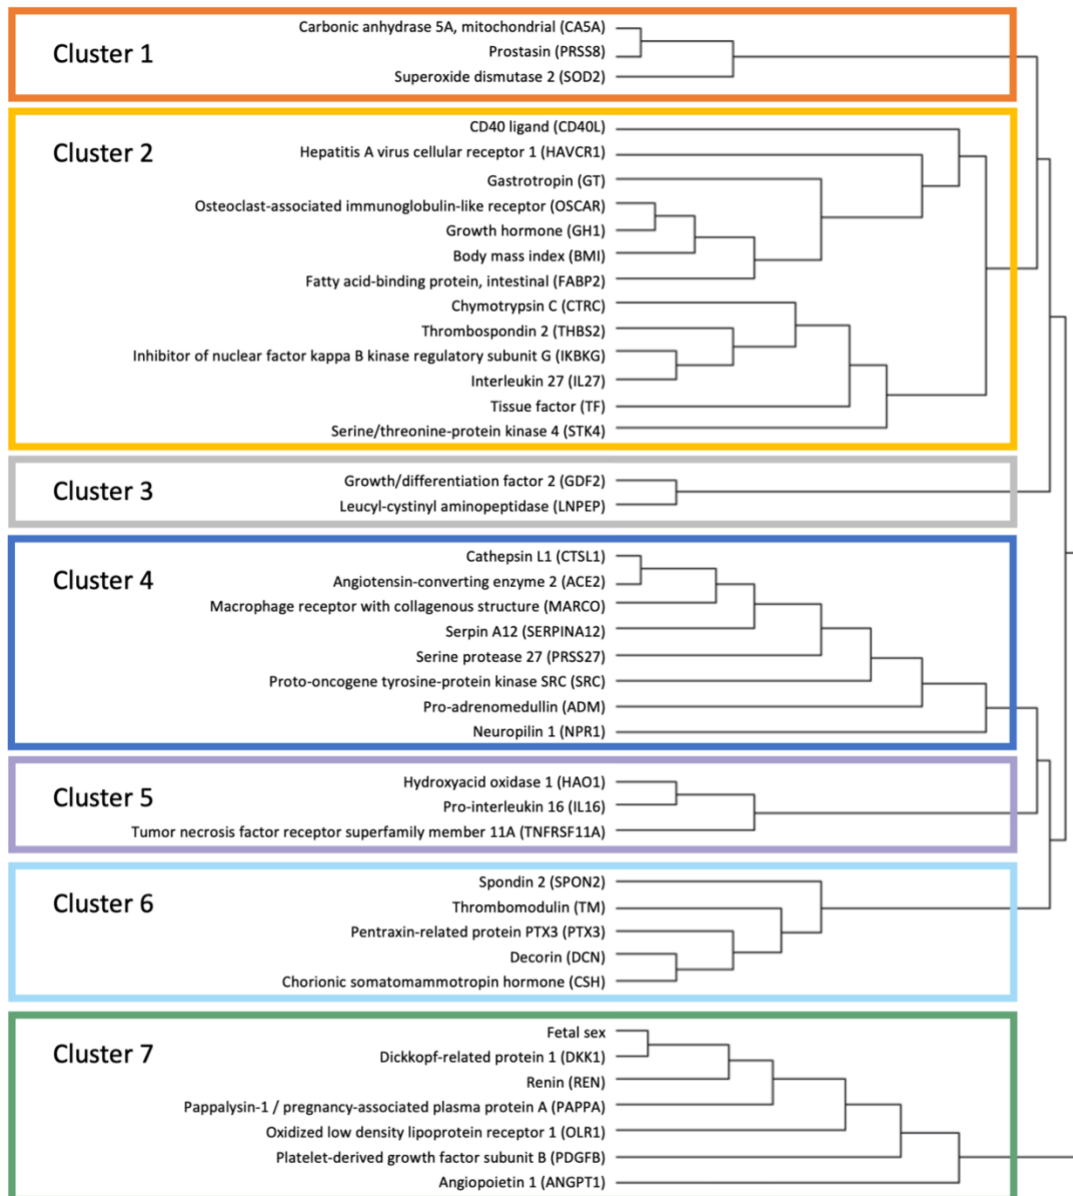

Figure 2: Dendrogram to accompany network analysis for pregnancies ending in fetal or neonatal death versus livebirths surviving to 29 days of life, based on edge betweenness analysis.

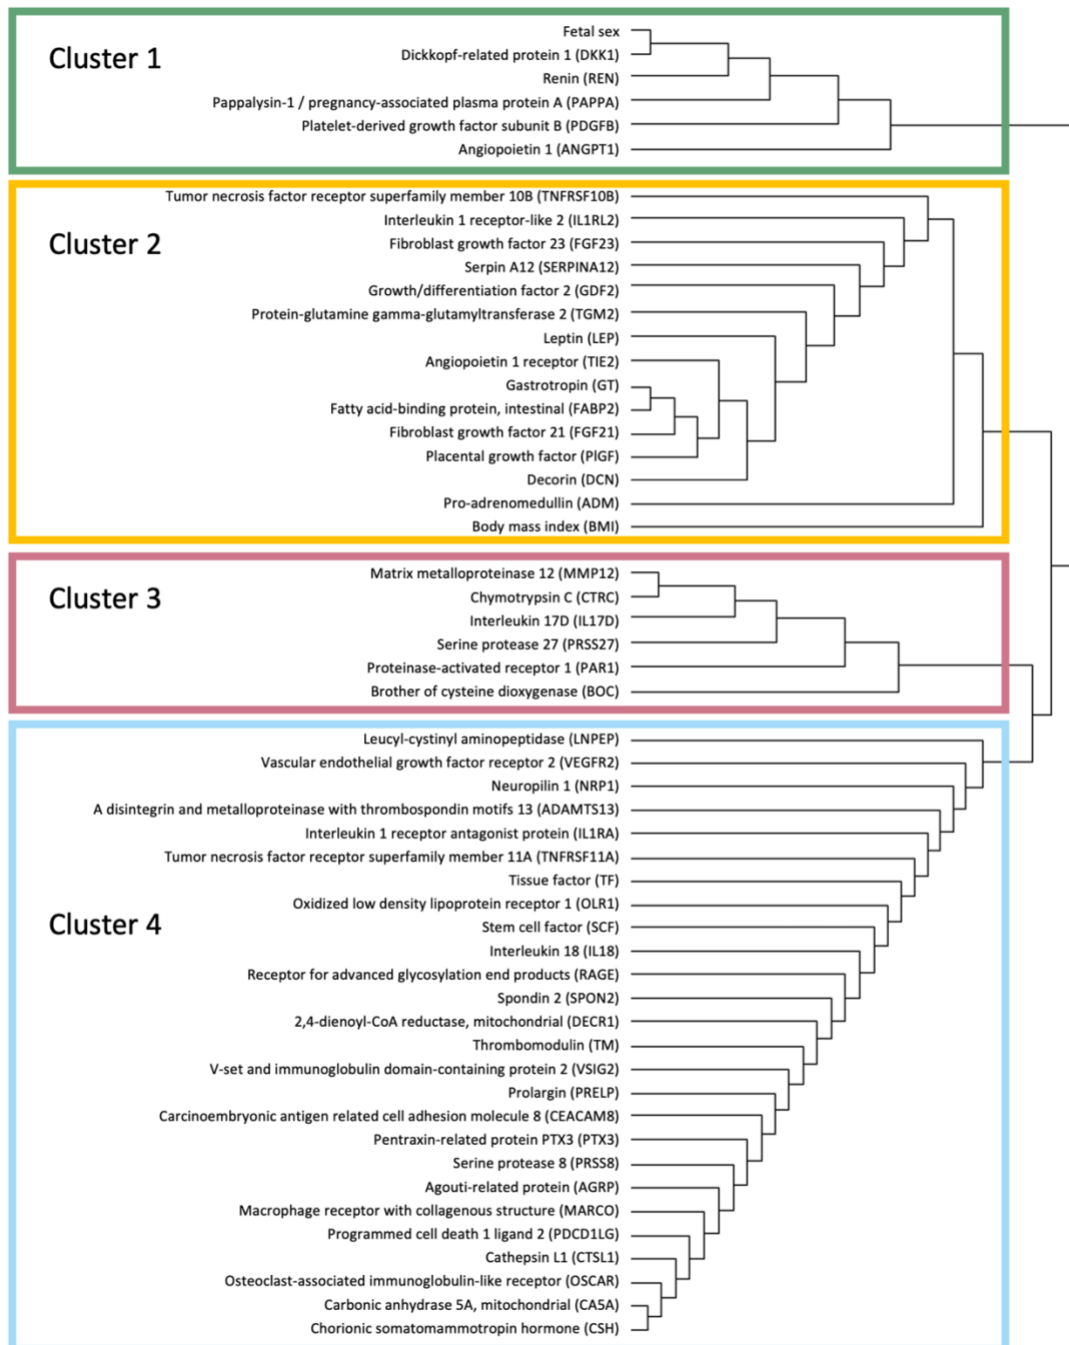

Figure 3: Dendrogram to accompany network analysis for pregnancies ending in fetal death or delivery  $\leq 28+0$  weeks of gestation versus continuation of pregnancy beyond 28+0 weeks, based on edge betweenness analysis.

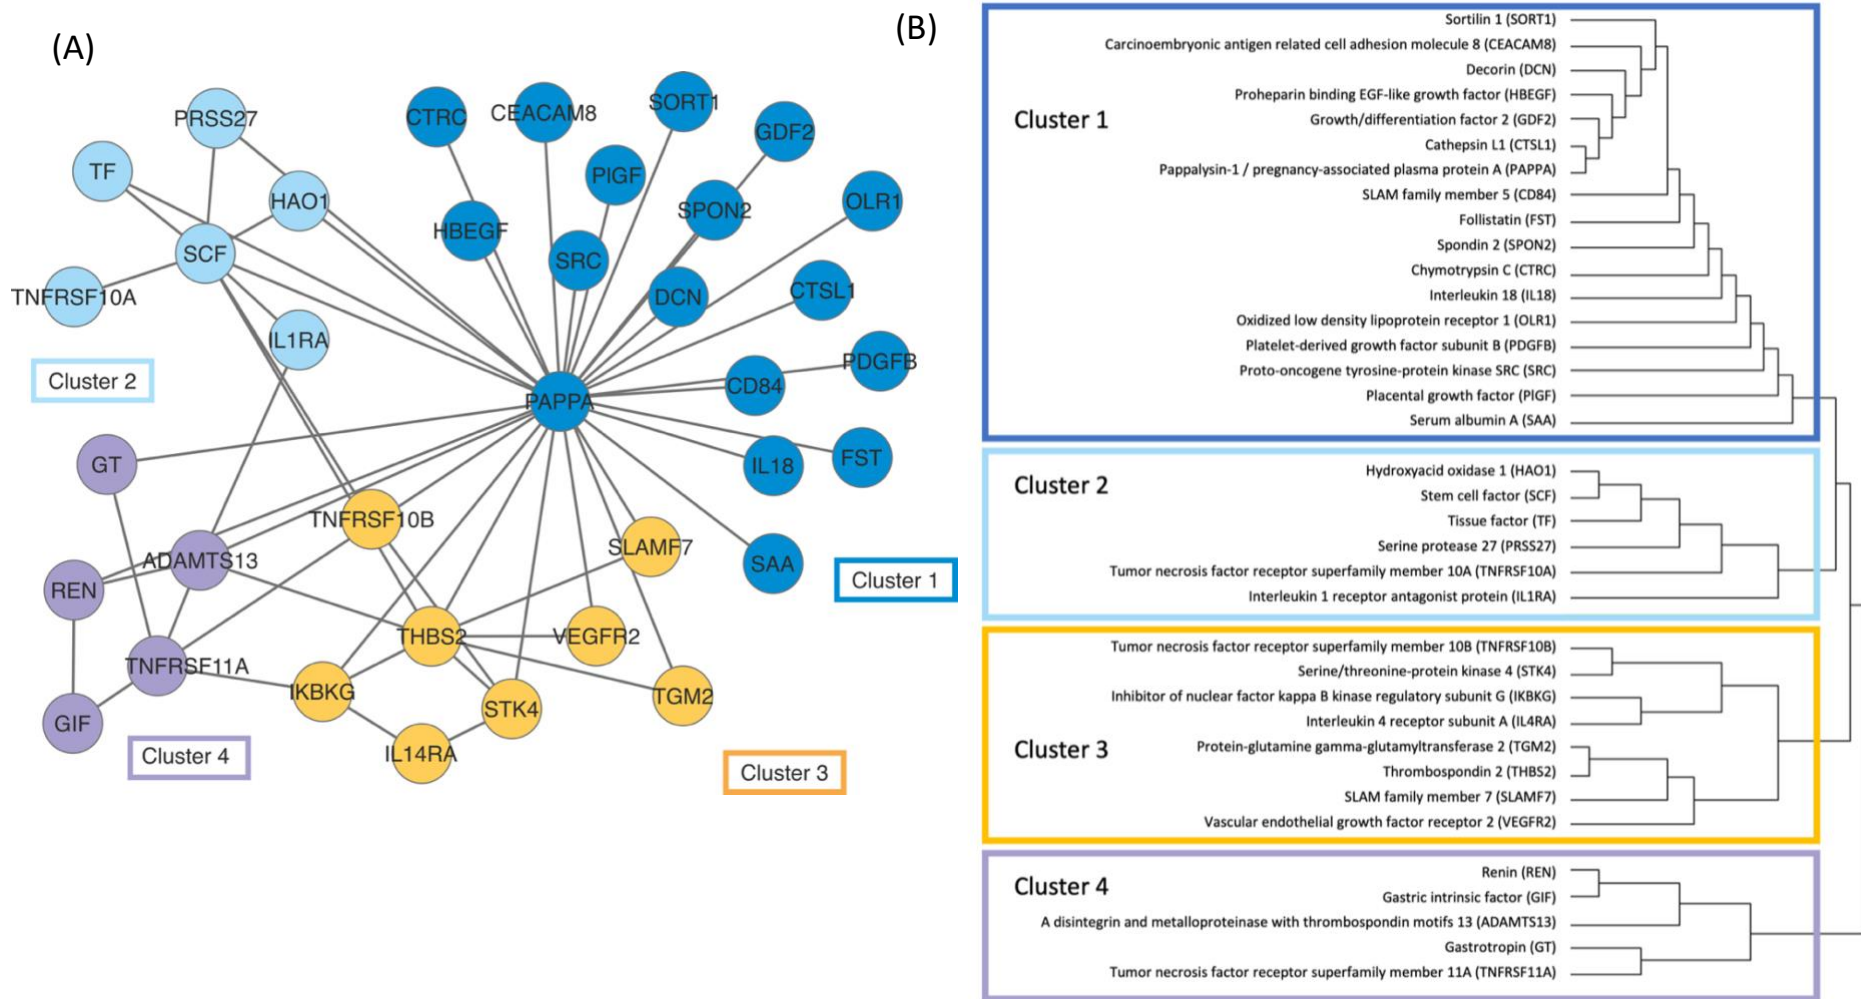

Figure 4: Network analysis for pregnancies that developed an abnormal Uma pulsatility index >95<sup>th</sup> centile versus those that did not. (A) Parenclitic protein network and clustering (B) Dendrogram, based on edge betweenness analysis.

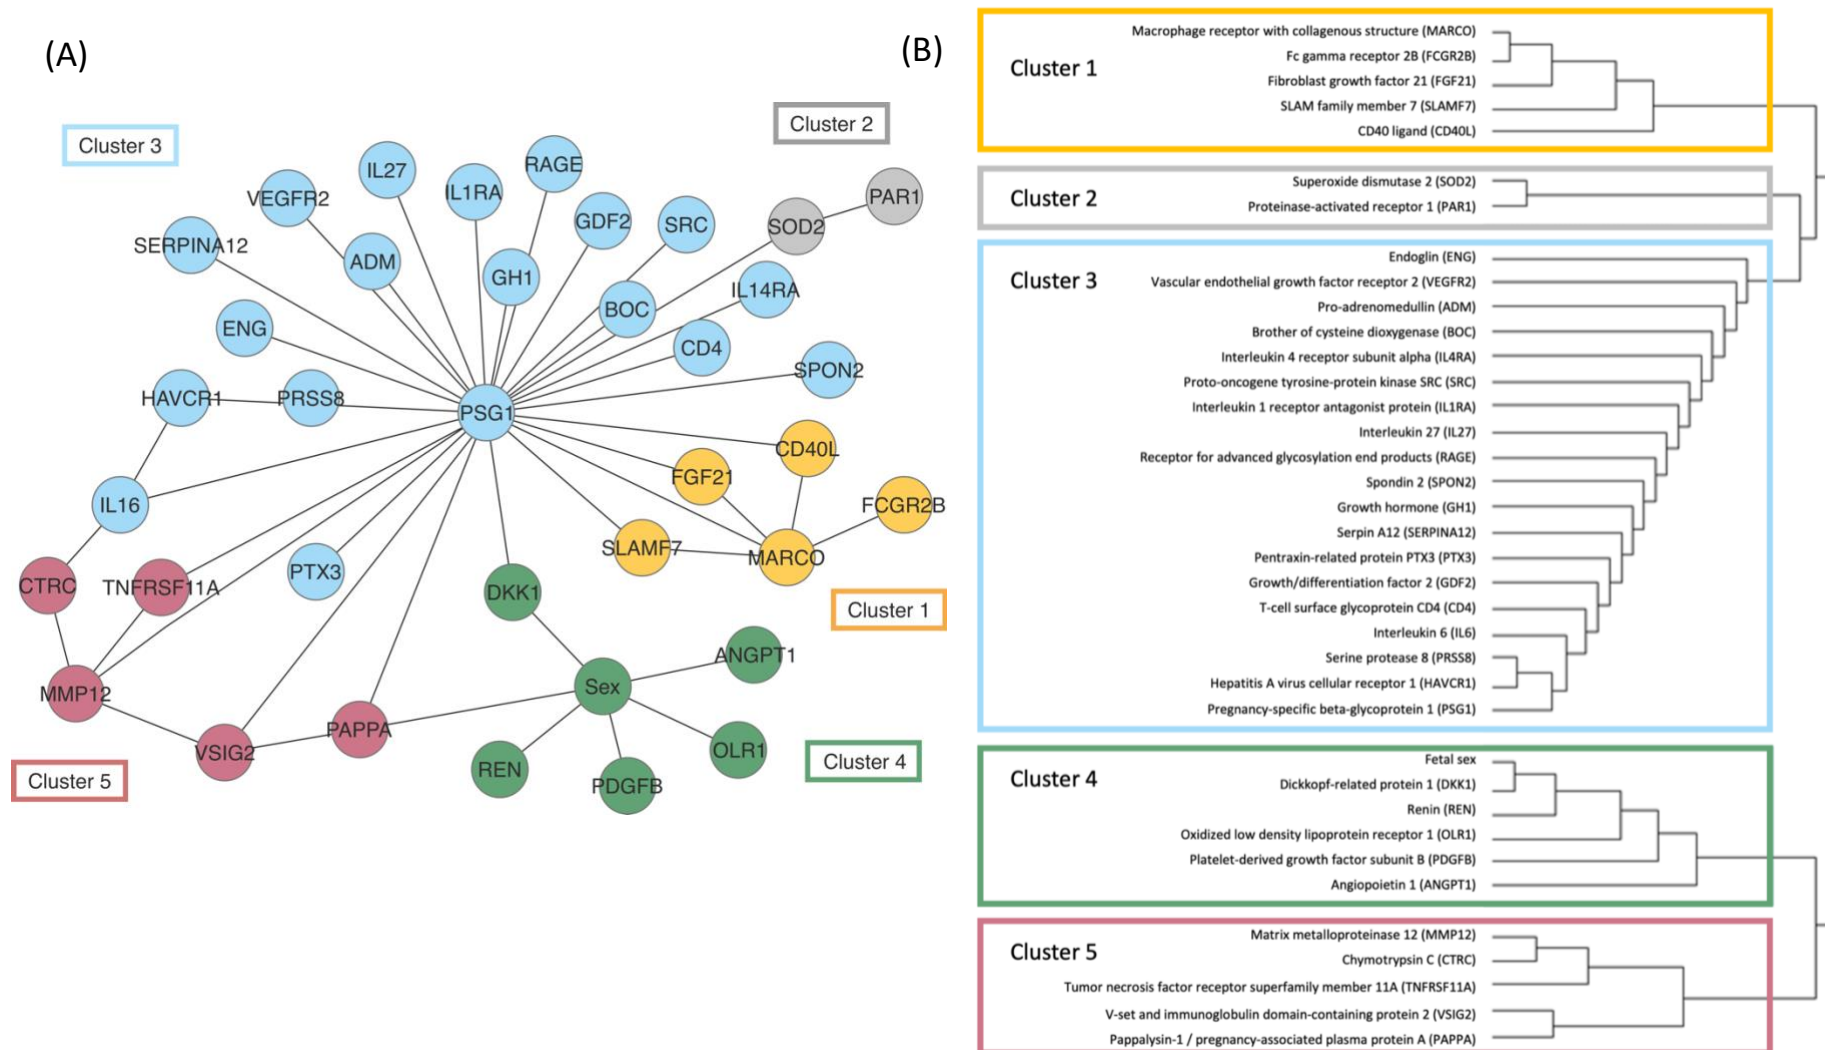

Figure 5: Network analysis for pregnancies with slow fetal growth versus those without slow fetal growth. (A) Parenchitic protein network and clustering (B) Dendrogram, based on edge betweenness analysis. Slow fetal growth was defined as a worsening of weight deviation of >10 percentage points over a two-week interval or equivalent trajectory over a longer period (Marsal, 2009).



Table 6: Experience and geographical origin of the 45 clinicians completing the marker priority survey.

| Specialty                                 |         |
|-------------------------------------------|---------|
|                                           | n (%)   |
| Consultant in Maternal and Fetal Medicine | 31 (69) |
| Consultant in Obstetrics and Gynaecology  | 8 (18)  |
| Other                                     | 6 (13)  |

| Location                  |         |
|---------------------------|---------|
|                           | n (%)   |
| Europe                    | 21 (47) |
| Australia and New Zealand | 6 (13)  |
| Asia and Middle East      | 5 (11)  |
| North and South America   | 4 (36)  |

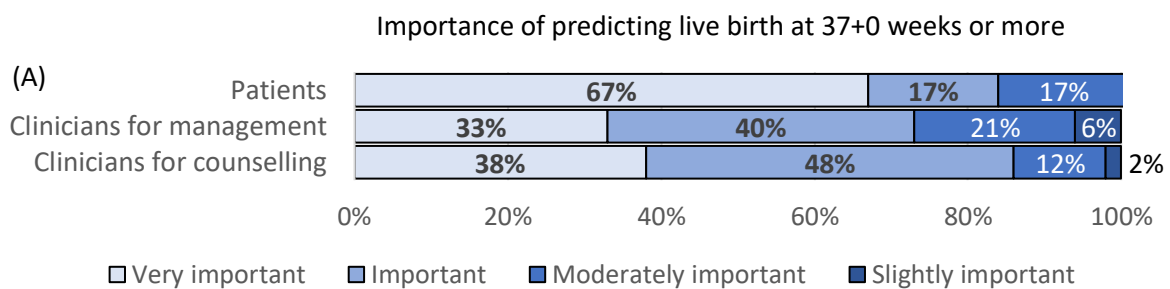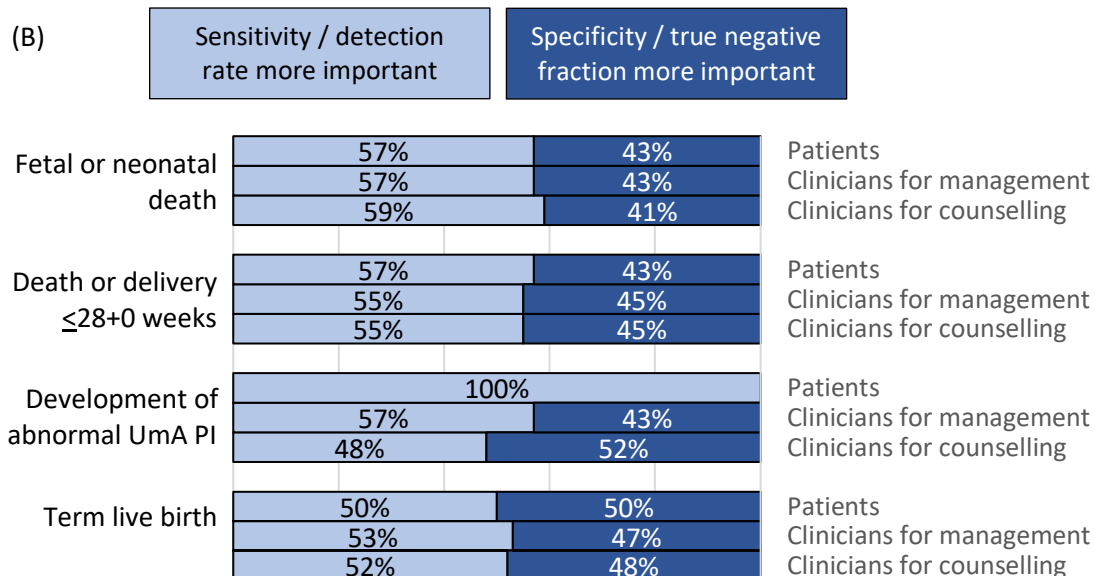

Figure 6: (A) The perceived importance of predicting term livebirth to patients, clinicians for the purpose of pregnancy management and clinicians for the purpose of patient counselling. (B) the proportion of respondents who prioritised either sensitivity or specificity for each pregnancy outcome. UmA PI=umbilical artery pulsatility index.

Table 7: Models significantly improved by the addition of gestational age or pre-eclampsia at enrolment. Likelihood ratio (LR) tests, Akaike information criteria (AIC) and Schwarz's Bayesian information criteria (BIC) showing the effects of the added variables.

| Outcome                                    | Variable(s)                                                             | LR test p value | AIC   | BIC   |
|--------------------------------------------|-------------------------------------------------------------------------|-----------------|-------|-------|
| Fetal or neonatal death                    | EFW <sub>HM</sub> z-score                                               | 0.0001          | 111.2 | 116.9 |
|                                            | EFW <sub>HM</sub> z-score & gestational age                             |                 | 97.2  | 105.6 |
|                                            | EFW <sub>HM</sub> z-score & Uma category <sup>1</sup>                   | <0.00005        | 107.7 | 116.1 |
|                                            | EFW <sub>HM</sub> z-score & Uma category & gestational age <sup>1</sup> |                 | 90.7  | 101.9 |
| Death or delivery ≤28+0 weeks of gestation | PIGF                                                                    | 0.013           | 128.9 | 134.5 |
|                                            | PIGF & pre-eclampsia                                                    |                 | 124.7 | 133.1 |
|                                            | PIGF & PSG1*                                                            | 0.0042          | 119.3 | 127.7 |
|                                            | PIGF & PSG1 & pre-eclampsia                                             |                 | 113.1 | 124.3 |
|                                            | Uma category <sup>1</sup>                                               | 0.0002          | 131.5 | 137.1 |
|                                            | Uma category & pre-eclampsia <sup>1</sup>                               |                 | 119.5 | 127.9 |
|                                            | Uma category & PIGF <sup>1</sup>                                        | 0.013           | 107.4 | 115.8 |
|                                            | Uma category & PIGF & pre-eclampsia <sup>1</sup>                        |                 | 103.2 | 114.4 |

<sup>1</sup>n=1 missing from validation set. EFW<sub>HM</sub>=estimated fetal weight calculated using Hadlock 3 formula (Hadlock et al., 1985) with z-score calculated using Marsal reference chart (Marsal et al., 1996), EFW<sub>Int</sub>=estimated fetal weight and z-score calculated using Intergrowth formulae (Stirnemann et al., 2017), PIGF=placental growth factor, PSG1=pregnancy-specific glycoprotein 1, Uma=umbilical artery.



Table 8: Details of the validated models to predict fetal or neonatal death. Constants and coefficients for calculating log(odds) provided, along with variable cut points that give the maximum positive likelihood ratio (LR+), maximum correct classification and minimum negative likelihood ratio (LR-). Calibration plots are provided in Supplemental Figure 7.

| Variable(s)                                                                                   | Constant<br>(95% CI)       | Coefficient(s)<br>(95% CI)                                                                                 | Cut point   | Value of the<br>variable | Correctly<br>classified | LR+  | LR-  | Sensitivity | Specificity |
|-----------------------------------------------------------------------------------------------|----------------------------|------------------------------------------------------------------------------------------------------------|-------------|--------------------------|-------------------------|------|------|-------------|-------------|
| PIGF                                                                                          | 4.20<br>(2.21 to 6.19)     | ln(PIGF): -1.43<br>(-2.04 to -0.826)                                                                       | Max LR+     | <14.2 pg/ml              | 80%                     | 18.3 | 0.56 | 45%         | 98%         |
|                                                                                               |                            |                                                                                                            | Max correct |                          |                         |      |      |             |             |
|                                                                                               |                            |                                                                                                            | Min LR-     |                          |                         |      |      |             |             |
| PIGF &<br>lymphotactin                                                                        | 4.09<br>(2.07 to 6.10)     | ln(PIGF): -1.41 (-2.03 to -0.795)<br>lymphotactin: 0.442 (-0.061 to 0.945)                                 | Max LR+     |                          | 70%                     | 11.6 | 0.87 | 14%         | 99%         |
|                                                                                               |                            |                                                                                                            | Max correct |                          | 80%                     | 7.4  | 0.49 | 55%         | 93%         |
|                                                                                               |                            |                                                                                                            | Min LR-     |                          | 47%                     | 1.2  | 0.00 | 100%        | 20%         |
| EFW <sub>HM</sub> z-score                                                                     | -8.02<br>(-10.83 to -5.20) | EFW <sub>HM</sub> z: -2.21<br>(-3.03 to -1.38)                                                             | Max LR+     | <-4.10                   | 78%                     | 30.9 | 0.63 | 38%         | 99%         |
|                                                                                               |                            |                                                                                                            | Max correct | <-3.46                   | 81%                     | 5.6  | 0.35 | 69%         | 88%         |
|                                                                                               |                            |                                                                                                            | Min LR-     | <-2.25                   | 44%                     | 1.2  | 0.00 | 100%        | 15%         |
| EFW <sub>HM</sub> z-score &<br>gestational age at<br>enrolment                                | 5.36<br>(-2.05 to 12.78)   | EFW <sub>HM</sub> z: -2.69 (-3.70 to -1.68)<br>GA: -0.915 (-0.141 to -0.042)                               | Max LR+     |                          | 78%                     | 30.9 | 0.63 | 38%         | 99%         |
|                                                                                               |                            |                                                                                                            | Max correct |                          | 85%                     | 8.3  | 0.31 | 71%         | 91%         |
|                                                                                               |                            |                                                                                                            | Min LR-     |                          | 47%                     | 1.2  | 0.00 | 100%        | 20%         |
| EFW <sub>Int</sub> z-score                                                                    | -5.72<br>(-7.73 to -3.72)  | EFW <sub>Int</sub> z: -1.24<br>(-1.71 to -0.76)                                                            | Max LR+     | <-5.16                   | 84%                     | 44.4 | 0.46 | 55%         | 99%         |
|                                                                                               |                            |                                                                                                            | Max correct |                          |                         |      |      |             |             |
|                                                                                               |                            |                                                                                                            | Min LR-     | <-1.68                   | 9%                      | 1.1  | 0.00 | 100%        | 9%          |
| EFW <sub>HM</sub> z-score &<br>UmA category <sup>1</sup>                                      | -7.30<br>(-10.16 to -4.45) | EFW <sub>HM</sub> z: -1.79 (-2.67 to -0.910)<br>UmA: 0.56 (0.083 to 1.04)                                  | Max LR+     |                          | 82%                     | 20.7 | 0.50 | 51%         | 98%         |
|                                                                                               |                            |                                                                                                            | Max correct |                          | 84%                     | 6.8  | 0.27 | 76%         | 89%         |
|                                                                                               |                            |                                                                                                            | Min LR-     |                          | 42%                     | 1.1  | 0.00 | 100%        | 12%         |
| EFW <sub>HM</sub> z-score &<br>UmA category &<br>gestational age at<br>enrolment <sup>1</sup> | 8.45<br>(0.264 to 16.63)   | EFW <sub>HM</sub> z: -2.27 (-3.34 to -1.21)<br>UmA: 0.784 (0.229 to 1.34)<br>GA: -0.108 (-0.164 to -0.520) | Max LR+     |                          | 83%                     | 41.5 | 0.49 | 51%         | 99%         |
|                                                                                               |                            |                                                                                                            | Max correct |                          | 85%                     | 5.7  | 0.17 | 85%         | 85%         |
|                                                                                               |                            |                                                                                                            | Min LR-     |                          | 48%                     | 1.3  | 0.00 | 100%        | 21%         |

<sup>1</sup>n=1 missing from validation set. PIGF=placental growth factor, UmA=umbilical artery. Models generated using the natural log of PIGF in pg/ml but cut points converted back to concentration. Models generated using centered and scaled values of lymphotactin normalised protein expression.

Table 9: Details of the validated models to predict death or delivery  $\leq 28+0$  weeks of gestation. Constants and coefficients for calculating log(odds) and variable cut points that give the maximum positive likelihood ratio (LR+), maximum correct classification and minimum negative likelihood ratio (LR-). Calibration plots are provided in Supplemental Figure 7.

| Variable(s)                                     | Constant<br>(95% CI)      | Coefficient(s)<br>(95% CI)                                                                             | Cut point   | Value of variable                | Correctly<br>classified | LR+  | LR-  | Sensitivity | Specificity |
|-------------------------------------------------|---------------------------|--------------------------------------------------------------------------------------------------------|-------------|----------------------------------|-------------------------|------|------|-------------|-------------|
| PIGF                                            | 5.17<br>(3.17 to 7.17)    | ln(PIGF): -1.50 (-2.07 to -0.924)                                                                      | Max LR+     | <14.5 pg/ml                      | 70%                     | 24.7 | 0.63 | 38%         | 98%         |
|                                                 |                           |                                                                                                        | Max correct | <34 pg/ml                        | 76%                     | 3.2  | 0.30 | 78%         | 75%         |
|                                                 |                           |                                                                                                        | Min LR-     | <240 pg/ml                       | 56%                     | 1.2  | 0.00 | 100%        | 17%         |
| PIGF & pre-eclampsia                            | 4.58<br>(2.57 to 6.58)    | ln(PIGF): -1.38 (-1.95 to -0.81)<br>Pre-eclampsia: 2.13 (2.57 to 4.24)                                 | Max LR+     |                                  | 72%                     | 26.9 | 0.60 | 41%         | 98%         |
|                                                 |                           |                                                                                                        | Max correct |                                  | 76%                     | 3.1  | 0.32 | 76%         | 76%         |
|                                                 |                           |                                                                                                        | Min LR-     |                                  | 56%                     | 1.2  | 0.00 | 100%        | 17%         |
| PIGF & PSG1                                     | 4.47<br>(2.38 to 6.56)    | ln(PIGF): -1.30 (-1.88 to -0.714)<br>PSG1: -0.846 (-1.37 to -0.318)                                    | Max LR+     |                                  | 67%                     | 21.3 | 0.68 | 33%         | 98%         |
|                                                 |                           |                                                                                                        | Max correct |                                  | 84%                     | 4.4  | 0.15 | 88%         | 80%         |
|                                                 |                           |                                                                                                        | Min LR-     |                                  | 53%                     | 1.1  | 0.00 | 100%        | 11%         |
| PIGF, PSG1 & pre-eclampsia                      | 3.66<br>(1.55 to 5.78)    | ln(PIGF): -1.13 (-1.71 to -0.55)<br>PSG1: -0.95 (-1.51 to -0.40)<br>Pre-eclampsia: 2.91 (0.30 to 5.53) | Max LR+     |                                  | 74%                     | 30.3 | 0.54 | 47%         | 98%         |
|                                                 |                           |                                                                                                        | Max correct |                                  | 83%                     | 4.3  | 0.17 | 86%         | 80%         |
|                                                 |                           |                                                                                                        | Min LR-     |                                  | 53%                     | 1.1  | 0.00 | 100%        | 11%         |
| UmA category <sup>1</sup>                       | -1.42<br>(-2.03 to -0.81) | UmA: 1.26 (0.81 to 1.72)                                                                               | Max LR+     | UmA PI >95 <sup>th</sup> centile | 63%                     | 8.0  | 0.78 | 25%         | 97%         |
|                                                 |                           |                                                                                                        | Max correct | Absent or reversed EDF           | 77%                     | 5.9  | 0.41 | 63%         | 89%         |
|                                                 |                           |                                                                                                        | Min LR-     | Reversed EDF                     | 73%                     | 2.4  | 0.29 | 81%         | 66%         |
| UmA category & pre-eclampsia <sup>1</sup>       | -1.76<br>(-2.45 to -1.06) | UmA: 1.32 (0.83 to 1.81)<br>Pre-eclampsia: 3.22 (1.02 to 5.43)                                         | Max LR+     |                                  | 69%                     | 12.0 | 0.65 | 37%         | 97%         |
|                                                 |                           |                                                                                                        | Max correct |                                  | 81%                     | 6.0  | 0.30 | 74%         | 88%         |
|                                                 |                           |                                                                                                        | Min LR-     |                                  | 75%                     | 2.4  | 0.22 | 86%         | 65%         |
| UmA category & PIGF <sup>1</sup>                | 3.49<br>(1.29 to 5.70)    | UmA: 1.06 (0.58 to 1.54)<br>ln(PIGF): -1.35 (-1.98 to -0.718)                                          | Max LR+     |                                  | 71%                     | 26.2 | 0.61 | 40%         | 98%         |
|                                                 |                           |                                                                                                        | Max correct |                                  | 83%                     | 4.3  | 0.18 | 86%         | 80%         |
|                                                 |                           |                                                                                                        | Min LR-     |                                  | 71%                     | 1.9  | 0.00 | 100%        | 46%         |
| UmA category, PIGF & pre-eclampsia <sup>1</sup> | 2.66<br>(0.38 to 4.93)    | UmA: 1.11 (0.61 to 1.61)<br>ln(PIGF): -1.18 (-1.81 to -0.55)<br>Pre-eclampsia: 2.38 (0.11 to 4.65)     | Max LR+     |                                  | 75%                     | 30.8 | 0.53 | 47%         | 98%         |
|                                                 |                           |                                                                                                        | Max correct |                                  | 84%                     | 4.5  | 0.13 | 89%         | 80%         |
|                                                 |                           |                                                                                                        | Min LR-     |                                  | 71%                     | 1.9  | 0.00 | 100%        | 46%         |

<sup>1</sup>n=1 missing from validation set. EDF=end-diastolic flow, PI=pulsatility index, PIGF=placental growth factor, PSG1=pregnancy-specific glycoprotein 1, UmA=umbilical artery. Models generated using the natural log of PIGF in pg/ml but cut points converted back to concentration. Models generated using and centered and scaled values of PSG1. UmA PI centile calculated using Schaffer and Staudach 1997.

Table 10: Details of the validated models to predict development of umbilical artery pulsatility index >95<sup>th</sup> centile. Constants and coefficients for calculating log(odds) provided, along with variable cut points that give the maximum positive likelihood ratio (LR+), maximum correct classification and minimum negative likelihood ratio (LR-).

| Protein(s)            | Constant<br>(95% CI)    | Coefficient<br>(95% CI)                                                             | Cut point   | PIGF<br>concentration<br>(pg/ml) | Correctly<br>classified | LR+ | LR-  | Sensitivity | Specificity |
|-----------------------|-------------------------|-------------------------------------------------------------------------------------|-------------|----------------------------------|-------------------------|-----|------|-------------|-------------|
| PIGF                  | 4.86<br>(1.49 to 8.23)  | -1.17<br>(-1.94 to -0.390)                                                          | Max LR+     | <24                              | 63%                     | 5.9 | 0.79 | 24%         | 96%         |
|                       |                         |                                                                                     | Max correct | <60                              | 74%                     | 3.0 | 0.38 | 71%         | 76%         |
|                       |                         |                                                                                     | Min LR-     | <270                             | 59%                     | 1.3 | 0.00 | 100%        | 24%         |
| PIGF &<br>fibronectin | 7.09<br>(1.94 to 12.24) | ln(PIGF): -1.44<br>(-2.38 to -0.503)<br>Fibronectin: -0.0035<br>(-0.0091 to 0.0021) | Max LR+     |                                  | 63%                     | 5.6 | 0.79 | 24%         | 96%         |
|                       |                         |                                                                                     | Max correct |                                  | 76%                     | 3.2 | 0.31 | 76%         | 76%         |
|                       |                         |                                                                                     | Min LR-     |                                  | 61%                     | 1.4 | 0.00 | 100%        | 28%         |

PIGF=placental growth factor. Models generated using the natural log of PIGF in pg/ml but cut points converted back to concentration.

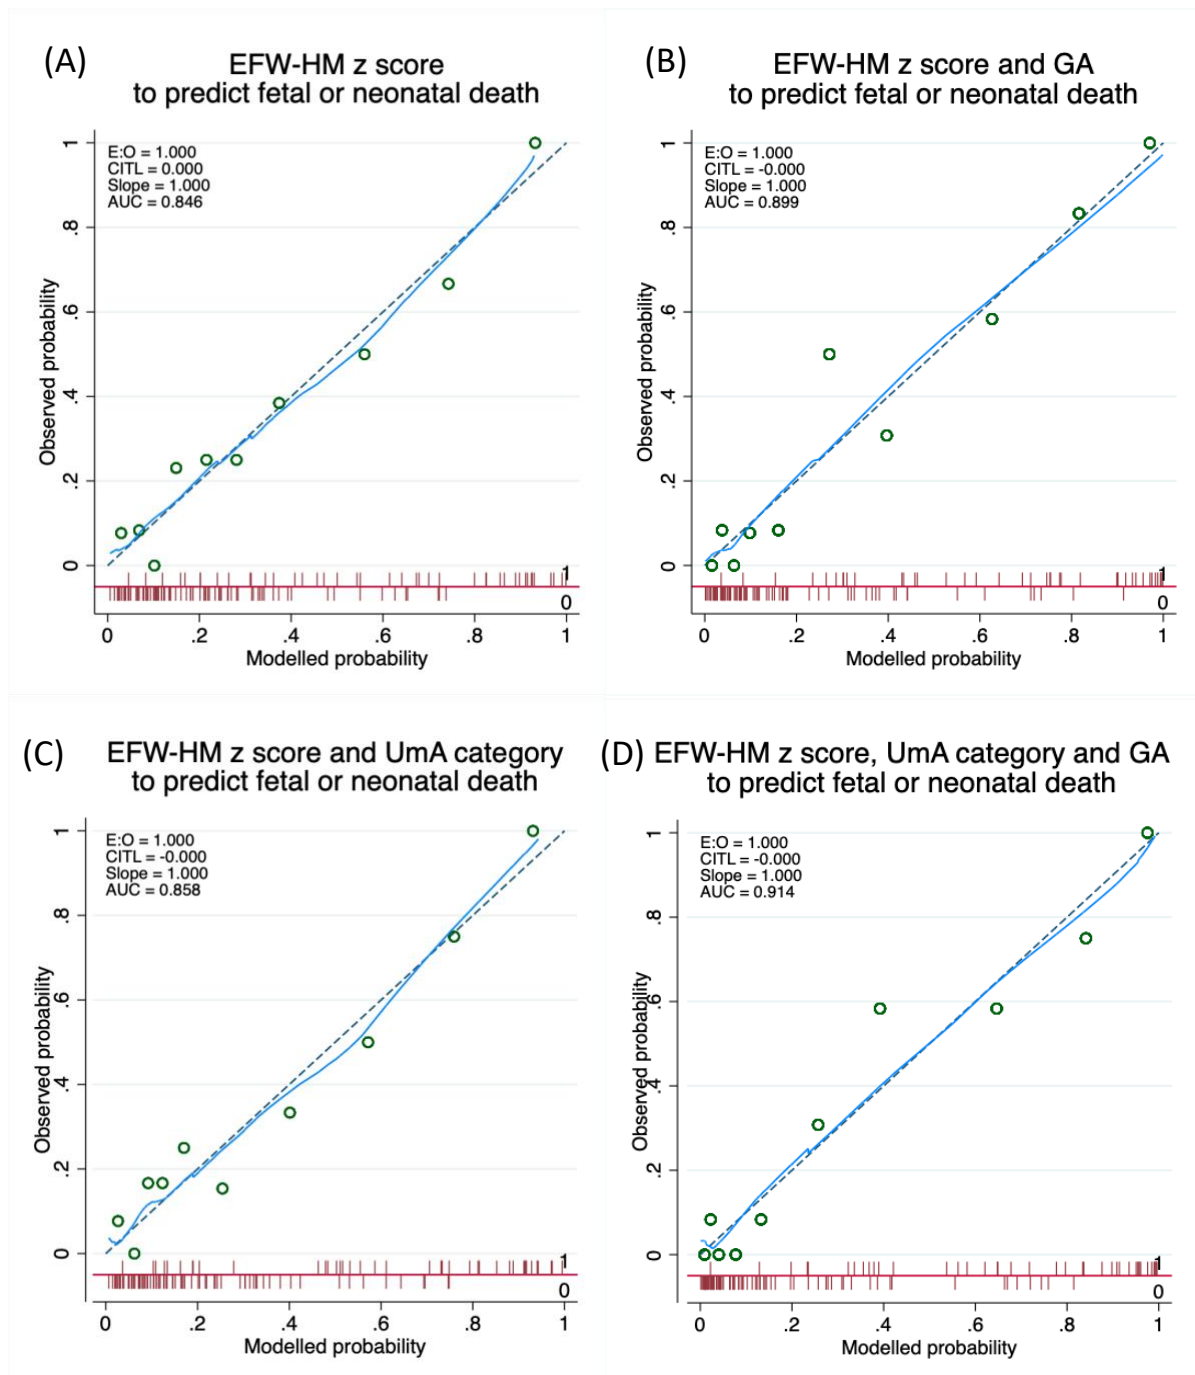

Figure 7: Calibration plots for the models in Tables 8 and 9. Green circles = grouped modelled probability plotted against grouped observed probability, solid blue line = locally weighted scatterplot smoothing (LOWESS), dashed grey line = line of unity. Spike plot (red) at the bottom of the chart area shows distribution of modelled probability by outcome (above line 1=fetal or neonatal death, below line 0=live birth and neonatal survival). CITL=calibration-in-the-large, EFW-HM=estimated fetal weight calculated using Hadlock 3 formula (Hadlock et al., 1985) with z-score calculated using Marsal reference chart (Marsal et al., 1996), E:O=ratio of expected to observed, GA=gestational age at study enrolment, UmA=umbilical artery.

(F) Intergrowth z score to predict fetal or neonatal death

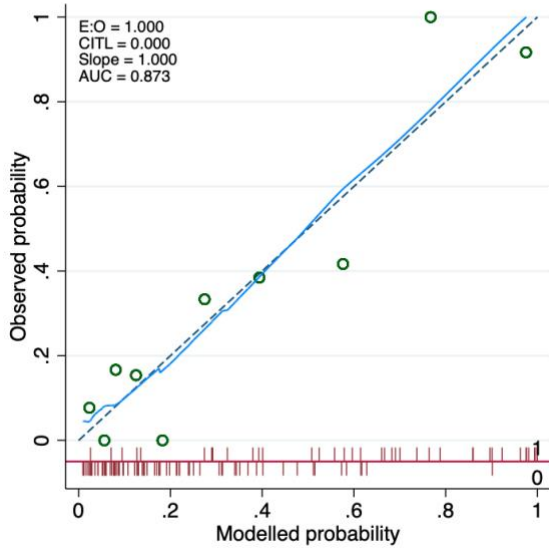

(G) PIGF to predict fetal or neonatal death

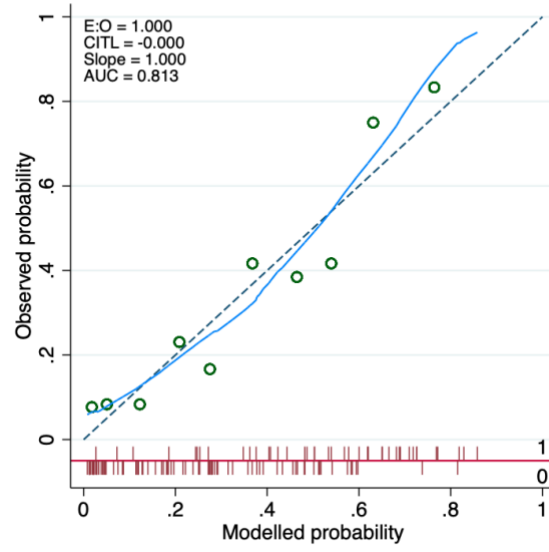

(H) PIGF and lymphotactin to predict fetal or neonatal death

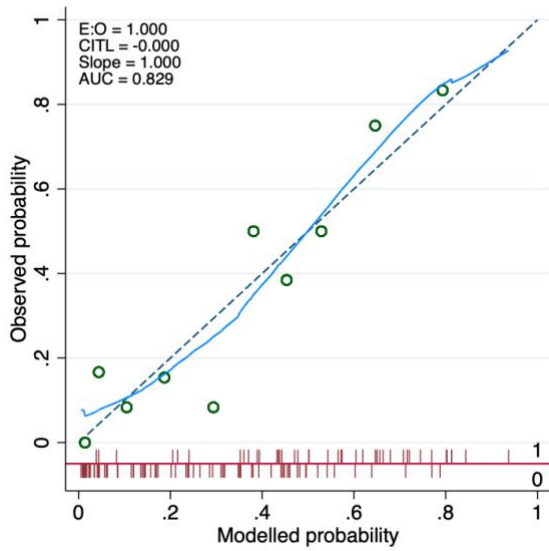

Figure 7 continued

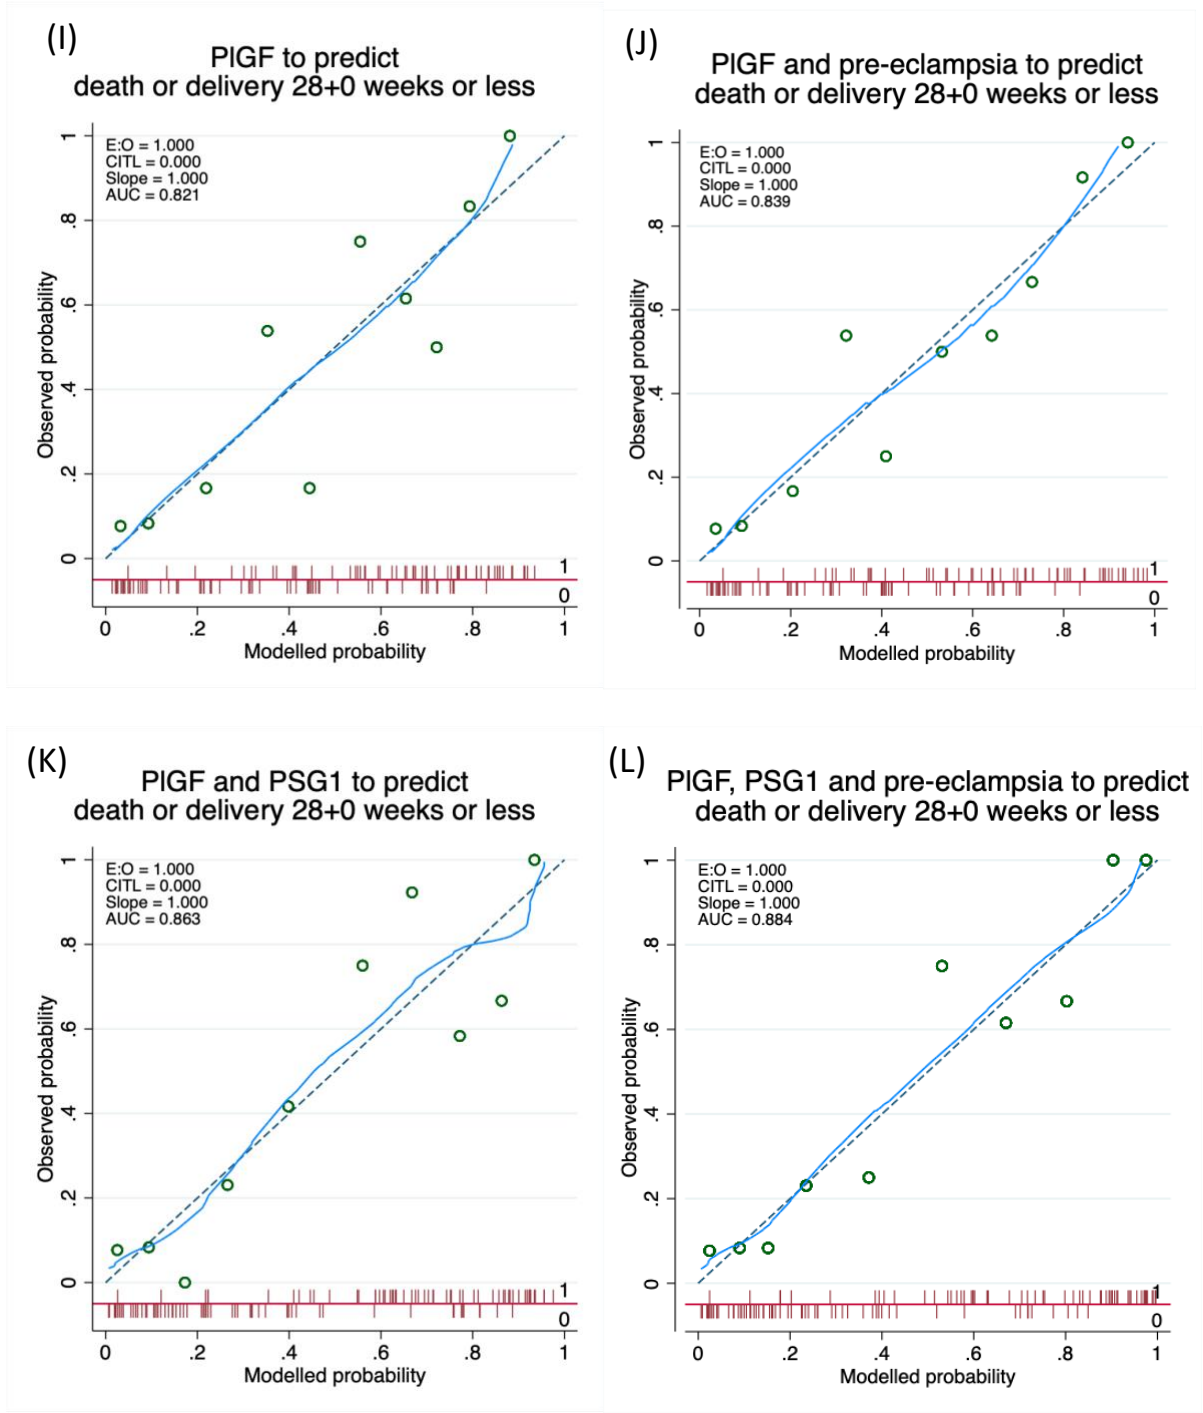

Figure 7 continued

(M) UmA category to predict death or delivery 28+0 weeks or less

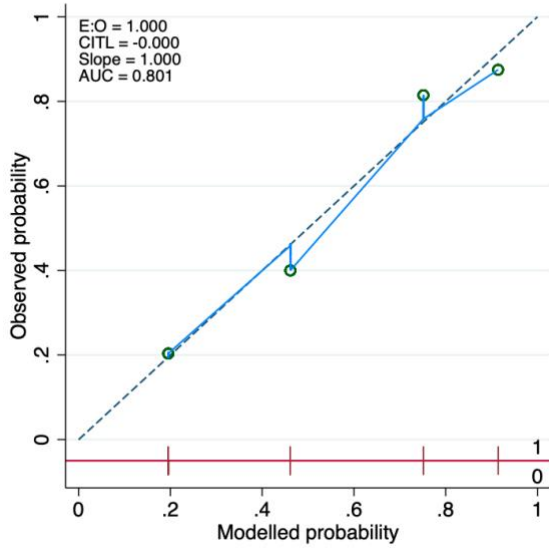

(N) UmA category and pre-eclampsia to predict death or delivery 28+0 weeks or less

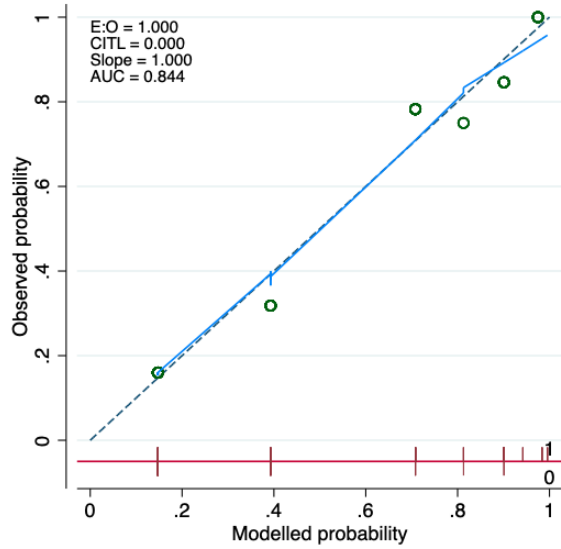

(O) PIGF and UmA category to predict death or delivery 28+0 weeks or less

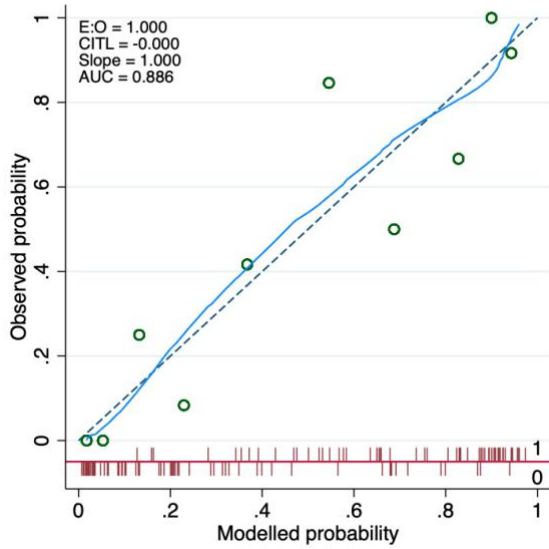

(P) PIGF, UmA and pre-eclampsia to predict death or delivery 28+0 weeks or less

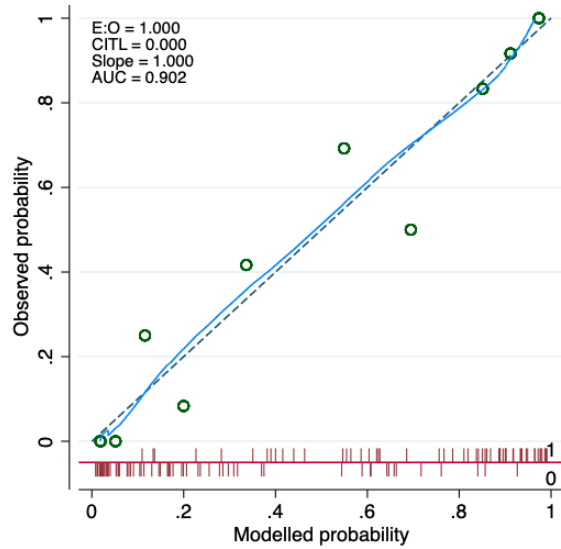

Figure 7 continued

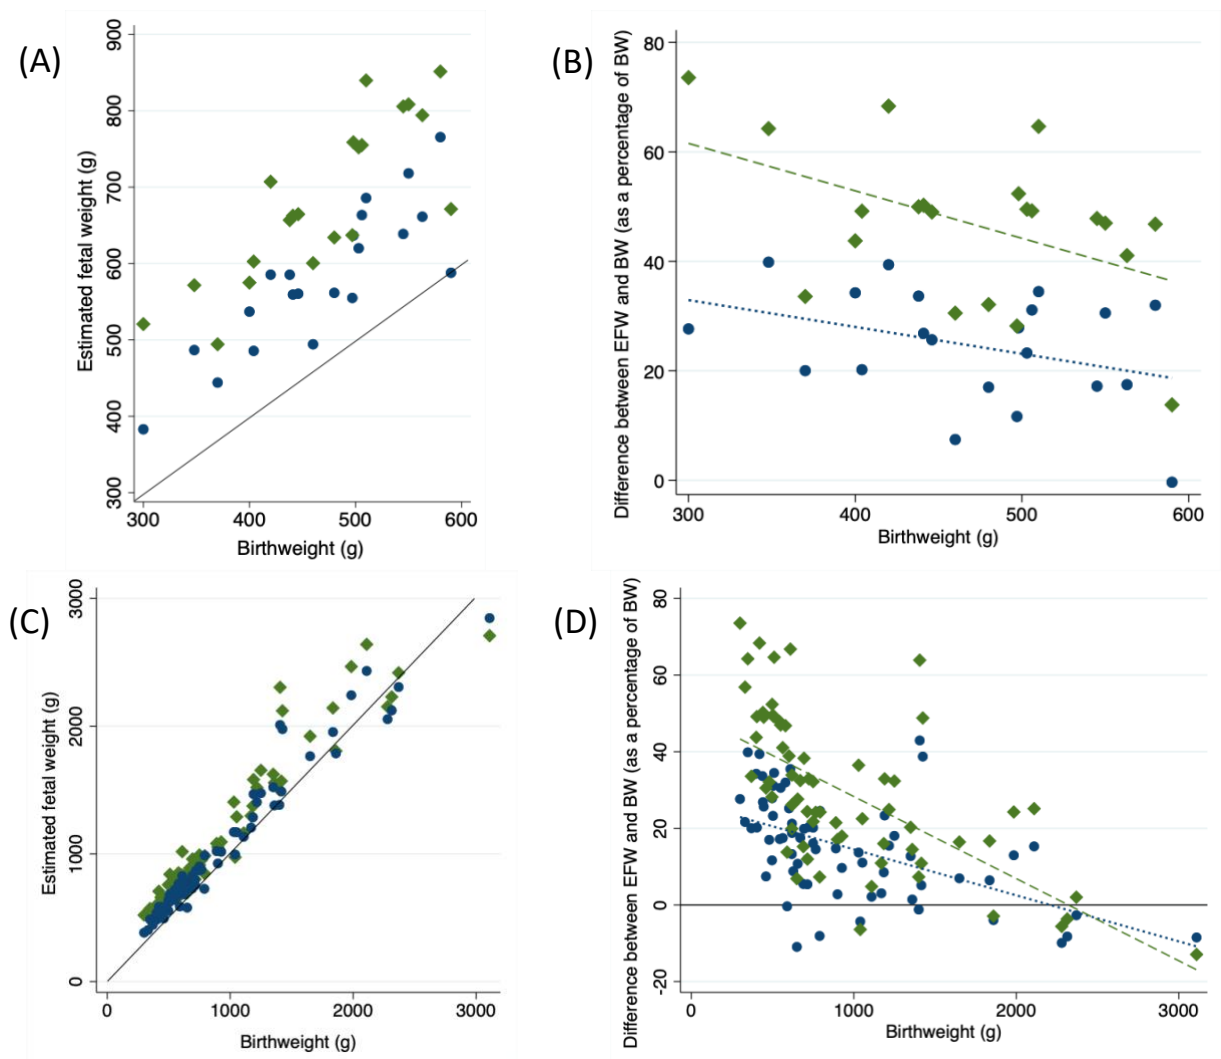

Figure 8: The differences between estimated fetal weights (EFWs) generated using the Intergrowth formula (green diamonds) (Stirnemann et al., 2017) and the Hadlock 3 formula (blue circles) (Hadlock et al., 1985) and birthweight (BW) for livebirths with an EFW performed within seven days of delivery. (A) Absolute differences for n=21 pregnancies with a BW <600g (B) percentage difference, as a percentage of BW, for n=21 pregnancies with a BW <600g (C) absolute differences for all n=67 pregnancies (D) percentage difference, as a percentage of BW, for all n=67 pregnancies. Solid black lines represent EFW=BW, green dashed lines= fitted association between BW and difference between Intergrowth EFW and BW as a percentage of BW, blue dotted line = fitted association between BW and difference between Hadlock 3 EFW and BW as a percentage of BW.



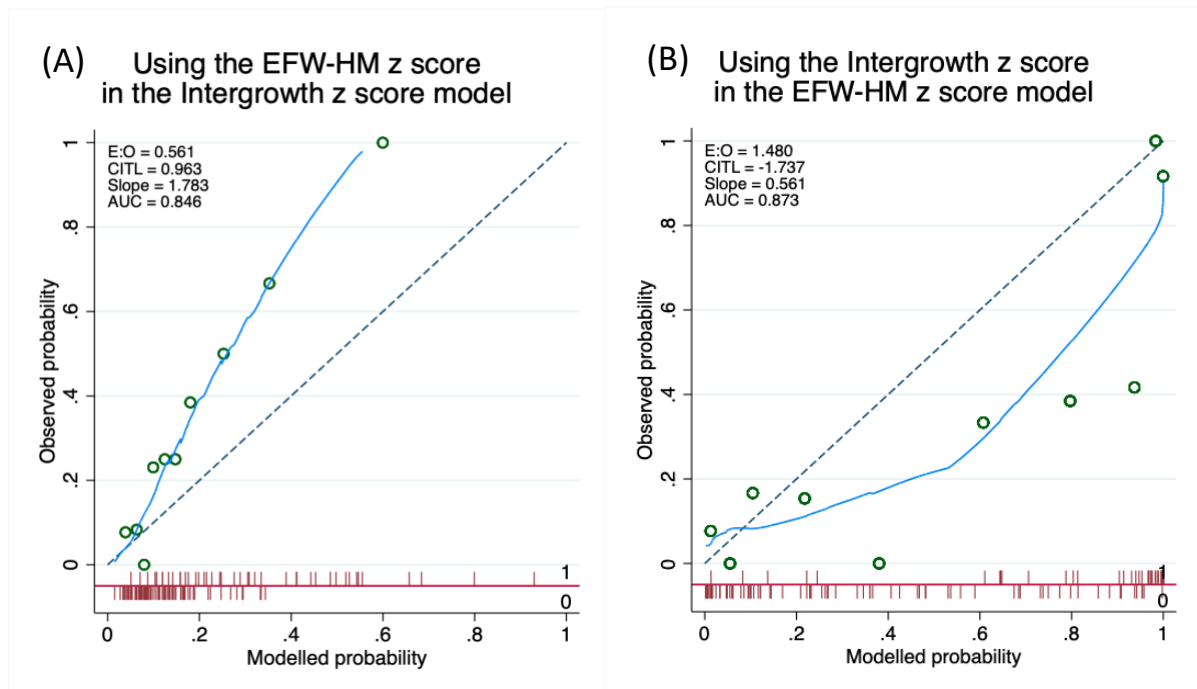

Figure 9: Calibration plots showing (A) the effect of using the estimated fetal weight calculated with the Hadlock 3 formula and z-score from the Marsal reference chart in the model generated from the Intergrowth z-score, and (B) the effect of using the Intergrowth z-score in the model generated from the Hadlock 3 formula estimated fetal weight z-score from the Marsal chart. Green circles = grouped modelled probability plotted against grouped observed probability, solid blue line = locally weighted scatterplot smoothing (LOWESS), dashed grey line = line of unity. Spike plot (red) at the bottom of the chart area shows distribution of modelled probability by outcome (above line 1=fetal or neonatal death, below line 0=live birth and neonatal survival). CITL=calibration-in-the-large, EFW-HM=estimated fetal weight calculated using Hadlock 3 formula (Hadlock et al., 1985) with z-score calculated using Marsal reference chart (Marsal et al., 1996), E:O=ratio of expected to observed. Intergrowth z-score from Stirnemann et al. 2017.

Table 11: Proteins showing an association with pregnancy outcomes at a Benjamini Hochberg 5% false discovery rate and Benjamini Hochberg 1% false discovery rate (over-shaded in blue) in centered and scaled data from the combined discovery and validation sets.

| Protein                                               | Abbreviation | Fetal or neonatal death<br>-log <sub>10</sub> (p value) | Death or delivery ≤28+0 weeks of gestation<br>-log <sub>10</sub> (p value) |
|-------------------------------------------------------|--------------|---------------------------------------------------------|----------------------------------------------------------------------------|
| Placental growth factor                               | PIGF         | 7.86                                                    | 10.52                                                                      |
| Chorionic somatomammotropin hormone                   | CSH          | 6.87                                                    | 9.84                                                                       |
| Pro-adrenomedullin                                    | ADM          | 4.02                                                    |                                                                            |
| Pregnancy-specific beta-1 glycoprotein                | PSG1         | 3.42                                                    | 5.09                                                                       |
| Thrombospondin 2                                      | THBS2        | 3.37                                                    | 5.04                                                                       |
| Hydroxyacid oxidase 1                                 | HAO1         | 2.94                                                    | 2.26                                                                       |
| Interleukin-17D                                       | IL17D        | 2.66                                                    | 2.26                                                                       |
| Growth hormone                                        | GH1          | 2.51                                                    | 2.38                                                                       |
| Macrophage receptor with collagenous structure        | MARCO        | 2.51                                                    |                                                                            |
| Programmed cell death 1 ligand 2                      | PDCD1LG2     |                                                         | 4.71                                                                       |
| Matrix metalloproteinase 12                           | MMP12        |                                                         | 4.31                                                                       |
| Soluble FMS-like tyrosine kinase 1                    | sFLT1        |                                                         | 3.31                                                                       |
| Galectin-9                                            | LGALS9       |                                                         | 3.23                                                                       |
| Decorin                                               | DCN          |                                                         | 3.20                                                                       |
| Interleukin-1 receptor-like 2                         | IL1RL2       |                                                         | 2.99                                                                       |
| Carbonic anhydrase 5A                                 | CA5A         |                                                         | 2.94                                                                       |
| Tumor necrosis factor receptor superfamily member 10B | TNFRSF10B    |                                                         | 2.75                                                                       |
| CD40 ligand                                           | CD40L        |                                                         | 2.59                                                                       |
| Fibroblast growth factor 21                           | FGF21        |                                                         | 2.44                                                                       |
| Oxidized low density lipoprotein receptor 1           | OLR1         |                                                         | 2.44                                                                       |
| Growth/differentiation factor 2                       | GDF2         |                                                         | 2.30                                                                       |
| Tumor necrosis factor receptor superfamily member 10A | TNFRSF10A    |                                                         | 2.08                                                                       |
| Fibronectin                                           | FN           |                                                         | 2.06                                                                       |
| Protein AMBP                                          | AMBP         |                                                         | 2.05                                                                       |
| Follistatin                                           | FST          |                                                         | 2.02                                                                       |

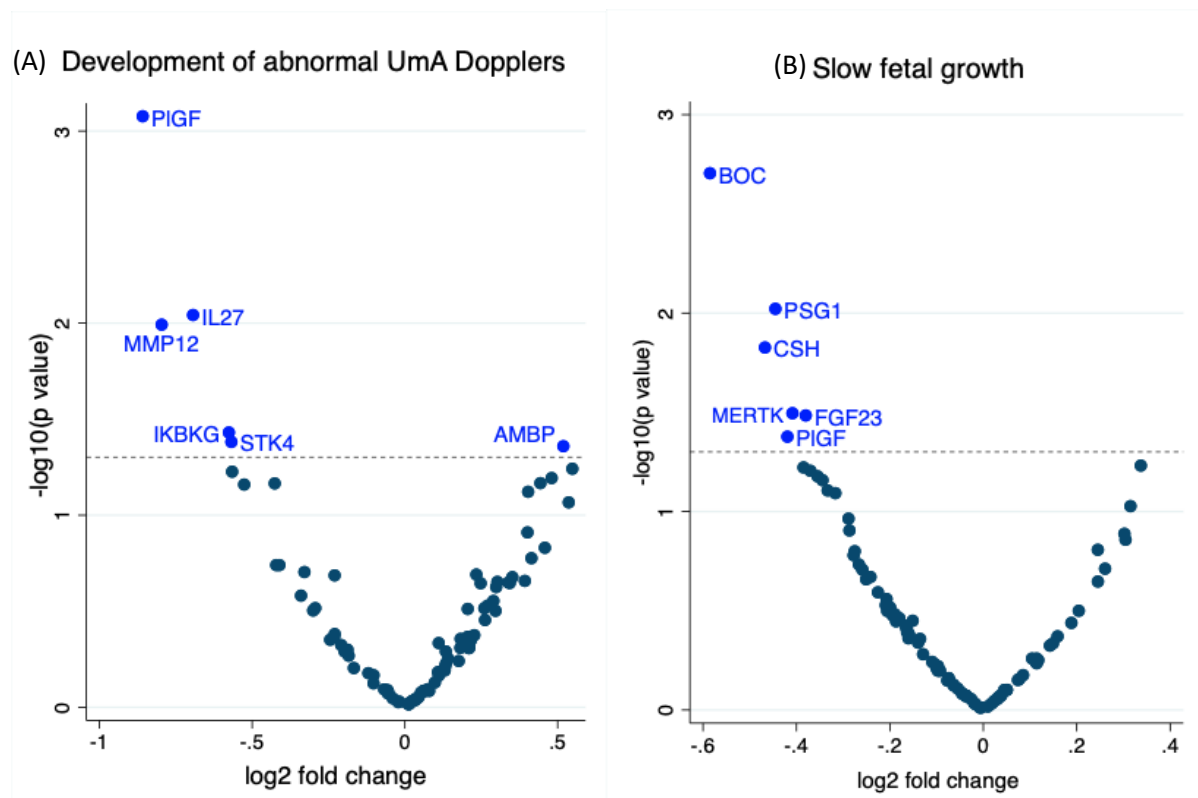

Figure 10: Volcano plots showing the statistical significance and magnitude of associations between the centred and scaled concentrations of the 93 proteins from the discovery and validation sets and (A) the development of abnormal umbilical artery (Uma) Dopplers (pulsatility index >95<sup>th</sup> centile) (B) slow fetal growth (a worsening of weight deviation of  $\geq 10$  percentage points over a two-week interval). Associations tested with 2-sided t tests. Dotted line indicates  $p=0.05$ . BOC=brother of cysteine dioxygenase, FGF23=fibroblast growth factor 23, CSH=chorionic somatomammotropin hormone, PIGF=placental growth factor, PSG1=pregnancy-specific beta-glycoprotein 1, IL27=interleukin 27, MERTK=tyrosine-protein kinase Mer, MMP12=matrix metalloproteinase-12, IKBKG=inhibitor of nuclear factor kappa B kinase regulatory subunit G, STK4=serine/threonine-protein kinase 4, AMBP=protein AMBP.

Table 12: Top three three-variable and top two-variable models for predicting fetal or neonatal death, death or delivery  $\leq 28+0$  weeks of gestation and the development of abnormal umbilical artery (UmA) Dopplers from the combined data set. Leave-one-out cross-validated models generated using centred and scaled values and evaluated on the basis of geometric mean of receiver operating characteristic curve area under the curve (AUC), precision-recall ROC area under the curve (PRROC), Matthews correlation coefficient (MCC) and  $F_1$  rankings, excluding models with variance inflation factors (VIFs) of five or more (see Methods).

| Outcome                                          | Variables | Proteins            | AUC (95% CI)     | PRROC | MCC  | $F_1$ |
|--------------------------------------------------|-----------|---------------------|------------------|-------|------|-------|
| Fetal or neonatal death                          | 3         | PIGF, IL16, ADM     | 0.81 (0.72-0.89) | 0.70  | 0.51 | 0.65  |
|                                                  |           | ADM, IL17D, PAPP A  | 0.78 (0.69-0.87) | 0.65  | 0.53 | 0.63  |
|                                                  |           | ADM, IL17D, PIGF    | 0.81 (0.73-0.90) | 0.68  | 0.48 | 0.64  |
|                                                  | 2         | PIGF, sFLT1         | 0.78 (0.69-0.87) | 0.62  | 0.45 | 0.59  |
| Death or delivery $\leq 28+0$ weeks of gestation | 3         | PIGF, CSH, OLR1     | 0.87 (0.80-0.93) | 0.84  | 0.58 | 0.78  |
|                                                  |           | PIGF, CSH, MARCO    | 0.85 (0.79-0.92) | 0.83  | 0.63 | 0.81  |
|                                                  |           | PIGF, CSH, ADAMTS13 | 0.86 (0.80-0.93) | 0.85  | 0.50 | 0.75  |
|                                                  | 2         | PIGF, PSG1          | 0.84 (0.77-0.92) | 0.80  | 0.57 | 0.78  |
| Development of abnormal UmA Dopplers             | 3         | PDGFB, PSGL1, IL18  | 0.79 (0.65-0.94) | 0.75  | 0.60 | 0.78  |
|                                                  |           | PDGFB, PSGL1, FGF23 | 0.80 (0.66-0.94) | 0.79  | 0.56 | 0.75  |
|                                                  |           | PDGFB, CTRC, leptin | 0.78 (0.63-0.93) | 0.74  | 0.60 | 0.78  |
|                                                  | 2         | PDGFB, PSGL1        | 0.79 (0.64-0.93) | 0.73  | 0.60 | 0.78  |

NOTE: the model containing PIGF and sFLT1 is not equivalent to a sFLT1:PIGF ratio. ADAMTS13=A disintegrin and metalloproteinase with thrombospondin motifs 13, ADM=pro-adrenomedullin, CTRC=chymotrypsin C, FGF23=fibroblast growth factor 23, CSH= chorionic somatomammotropin hormone, OLR1=oxidised low density lipoprotein receptor 1, MARCO=macrophage receptor with collagenous structure, PAPP A=pregnancy-associated plasma protein A, PDGFB=platelet-derived growth factor subunit B, PIGF=placental growth factor, PSG1=pregnancy-specific beta-1 glycoprotein, PSGL1=p-selectin glycoprotein ligand 1, sFLT1=soluble fms-like tyrosine kinase 1.

Table 13: Protein and ultrasound measurements at enrolment showing a significant association with gestational age at livebirth or diagnosis of fetal death and/or interval between enrolment and livebirth or diagnosis of fetal death at a Benjamini-Hochberg 1% false discovery rate.

|                  | Strength of association with gestational age at livebirth or diagnosis of fetal death<br>-log <sub>10</sub> (p value) | Strength of association with interval between enrolment and livebirth or diagnosis of fetal death or livebirth<br>-log <sub>10</sub> (p value) |
|------------------|-----------------------------------------------------------------------------------------------------------------------|------------------------------------------------------------------------------------------------------------------------------------------------|
| PlGF             | 22.0                                                                                                                  | 17.2                                                                                                                                           |
| CSH              | 11.1                                                                                                                  | 8.0                                                                                                                                            |
| UmA category     | 9.9                                                                                                                   | 11.0                                                                                                                                           |
| Mean UtA PI      | 7.2                                                                                                                   | 6.5                                                                                                                                            |
| Thrombospondin 2 | 7.1                                                                                                                   | 5.5                                                                                                                                            |
| sFLT1            | 6.9                                                                                                                   | 8.0                                                                                                                                            |
| MMP12            | 6.1                                                                                                                   | 6.8                                                                                                                                            |
| Decorin          | 5.7                                                                                                                   | 4.7                                                                                                                                            |
| IL1RL2           | 5.1                                                                                                                   |                                                                                                                                                |
| PSG1             | 5.1                                                                                                                   |                                                                                                                                                |
| Growth hormone   | 4.2                                                                                                                   |                                                                                                                                                |
| Protein AMBP     | 4.2                                                                                                                   |                                                                                                                                                |

CSH= chorionic somatomammotropin hormone, IL1RL2=interleukin-1 receptor-like 2, MMP12=matrix metalloproteinase 12, PlGF=placental growth factor, PSG1=pregnancy specific glycoprotein 1, sFLT1=soluble fms-like tyrosine kinase 1, UmA=umbilical artery, UtA PI=uterine artery pulsatility index.

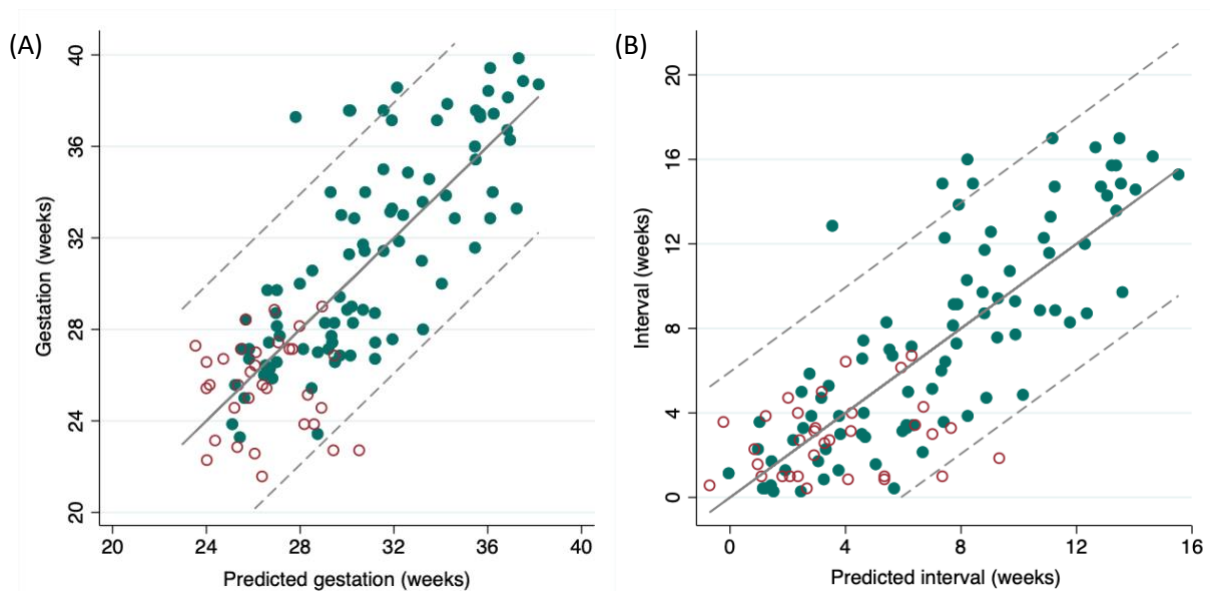

Figure 11: (A) Predicted versus actual gestational age of either livebirth or diagnosis of fetal death, based on the sparser model containing PlGF and sFLT1 concentration and umbilical artery Doppler category (B) Predicted versus actual interval from enrolment to either livebirth or diagnosis of fetal death, based on the sparser model containing PlGF and sFLT1 concentrations, umbilical artery Doppler category and gestational age at enrolment. Green filled circles=pregnancies ending in livebirth, red hollow circles=pregnancies ending in fetal death, dotted lines=95% prediction intervals.

Table 14: Comparison of the maternal and pregnancy characteristics of participants with and without samples available for placental histological classification.

| Characteristics and outcomes                                                           | Sample available (n=55) | No sample available (n=68) | p value            |
|----------------------------------------------------------------------------------------|-------------------------|----------------------------|--------------------|
| Maternal age (years, mean SD)                                                          | 33 (6.7)                | 34 (5.9)                   | 0.18 <sup>1</sup>  |
| BMI (median IQR)                                                                       | 24.9 (22.8-29.0)        | 26.2 (22.8-30.0)           | 0.87 <sup>2</sup>  |
| Ethnicity (n %)                                                                        |                         |                            |                    |
| White                                                                                  | 33 (61)                 | 37 (56)                    | 0.82 <sup>3</sup>  |
| Black                                                                                  | 11 (20)                 | 14 (21)                    |                    |
| Asian                                                                                  | 10 (18)                 | 15 (23)                    |                    |
| Mean UtA PI >95 <sup>th</sup> centile at enrolment (Schaffer and Staudach, 1997) (n %) | 43 (80)                 | 55 (81)                    | 0.86 <sup>3</sup>  |
| Female fetus (n %)                                                                     | 34 (63)                 | 26 (41)                    | 0.016 <sup>3</sup> |
| Stillbirth (n %)                                                                       | 14 (25)                 | 19 (28)                    | 0.76 <sup>3</sup>  |
| Gestational age at delivery (median IQR)                                               | 28+3 (26+5 to 33+0)     | 27+6 (26+2 to 34+1)        | 0.81 <sup>2</sup>  |
| Caesarean delivery (n %)                                                               | 40 (73)                 | 39 (58)                    | 0.10 <sup>3</sup>  |

PI=pulsatility index, UmA=umbilical artery, UtA=uterine artery. <sup>1</sup>two-sided t test, <sup>2</sup>Wilcoxon rank sum, <sup>3</sup>chi square test. Missing: maternal ethnicity for 1 pregnancy with a placental sample and two pregnancies without placental samples; mean UtA PI for one pregnancy with a placental sample; fetal sex for one stillborn pregnancy with a placental sample; fetal sex for four stillborn pregnancies without placental samples.

Table 15: Pregnancy outcome by Amsterdam consensus placental classification (Khong et al., 2016) for the 55 pregnancies with available placental histology samples.

| Classification   |      | Stillbirth | Neonatal death | Neonatal survival |
|------------------|------|------------|----------------|-------------------|
| Normal           | n=10 | 1          | 0              | 9                 |
| MVM              | n=39 | 12         | 0              | 27                |
| VUE              | n=3  | 1          | 1              | 1                 |
| Dysmorphic villi | n=2  | 0          | 1              | 1                 |
| FVM              | n=1  | 0          | 1              | 0                 |

FVM=fetal vascular malperfusion, MVM=maternal vascular malperfusion, VUE=villitis of unknown aetiology.

Table 16: Associations between ultrasound measurements and maternal serum protein concentrations at enrolment and subsequent placental classification of (1) any placental pathology (2) maternal vascular malperfusion (MVM) according to the Amsterdam consensus criteria (Khong et al., 2016).

|                                                                                    | Any placental pathology (n=45)                 | No placental pathology identified (n=10) | p value           | MVM (n=39)          | non-MVM (n=16)      | p value           | AUC (95% CI)     |
|------------------------------------------------------------------------------------|------------------------------------------------|------------------------------------------|-------------------|---------------------|---------------------|-------------------|------------------|
| EFW <sub>HM</sub> z-score (median IQR) (Hadlock et al., 1985, Marsal et al., 1996) | -3.0 (-3.4 to -2.6)                            | -2.8 (-3.4 to -2.0)                      | 0.44              | -2.9 (-3.3 to -2.6) | -3.2 (-3.4 to -2.6) | 0.63              |                  |
| EFW <sub>int</sub> z-score (median IQR) (Stirnermann et al., 2017)                 | -3.4 (-4.3 to -2.6)                            | -3.0 (-4.9 to -2.6)                      | 0.72              | -3.4 (-4.2 to -2.6) | -3.4 (-4.9 to -2.6) | 0.78              |                  |
| UmA category at enrolment (n %)                                                    | PI $\leq$ 95 <sup>th</sup> centile             | 6 (60)                                   | 0.57 <sup>#</sup> | 18 (46)             | 7 (44)              | 0.54 <sup>#</sup> |                  |
|                                                                                    | PI >95 <sup>th</sup> centile with positive EDF | 1 (10)                                   |                   | 12 (31)             | 3 (19)              |                   |                  |
|                                                                                    | Absent EDF                                     | 2 (20)                                   |                   | 4 (10)              | 4 (25)              |                   |                  |
|                                                                                    | Reversed EDF                                   | 1 (10)                                   |                   | 5 (13)              | 2 (13)              |                   |                  |
| Abnormal UmA PI (>95 <sup>th</sup> centile) at any point before delivery (n %)     | 33 (73)                                        | 5 (50)                                   | 0.15              | 28 (72)             | 10 (63)             | 0.50              |                  |
| Absent or reversed UmA end-diastolic flow at any point before delivery (n %)       | 27 (60)                                        | 4 (40)                                   | 0.30 <sup>#</sup> | 22 (56)             | 9 (56)              | 0.99              |                  |
| Mean UtA PI at enrolment (mean SD) <sup>1</sup>                                    | 1.70 (0.67)                                    | 1.59 (0.69)                              | 0.63              | 1.80 (0.63)         | 1.40 (0.68)         | 0.044             | 0.68 (0.51-0.84) |
| PlGF (pg/ml; median IQR)                                                           | 27.8 (18.0-56.6)                               | 73.3 (22.6-279.6)                        | 0.06              | 26.7 (17.9-56.6)    | 61.7 (29.8-195.8)   | 0.043             | 0.68 (0.52-0.84) |
| CSH (mcg/ml; median IQR)                                                           | 110 (77-141)                                   | 134 (85-186)                             | 0.49              | 101 (74-140)        | 135 (93-182)        | 0.24              |                  |
| PAPPA (NPX; mean SD)                                                               | 0.15 (0.88)                                    | -0.28 (0.71)                             | 0.16              | 0.23 (0.76)         | -0.31 (1.01)        | 0.036             | 0.67 (0.51-0.84) |

EFW<sub>HM</sub>=estimated fetal weight calculated using Hadlock 3 formula (Hadlock et al., 1985) with z-score calculated using Marsal reference chart (Marsal et al., 1996), EFW<sub>int</sub>=estimated fetal weight and z-score calculated using Intergrowth formula and chart (Stirnermann et al., 2017), CSH= chorionic somatomammotropin hormone, NPX=normalised protein expression, PAPPA=pregnancy-associated plasma protein A, PI=pulsatility index, PlGF=placental growth factor, UmA=umbilical artery, UtA=uterine artery. PlGF analysed as a natural log for AUC, NPX centred and scaled. n=1 missing from MVM, <sup>#</sup>Fisher's exact test

## Methods

Equation 1: Hadlock 3 EFW formula (Hadlock et al., 1985)

$$\log_{10}EFW = 1.326 - 0.00326 \times AC \times FL + 0.0107 \times HC + 0.0438 \times AC + 0.158 \times FL$$

Where AC = abdominal circumference, FL = femur length and HC = head circumference. EFW given in grams with measurements in centimetres.

Equation 2: Marsal EFW z-score (Marsal et al., 1996)

$$z\ score = \frac{EFW - (-2.278843 \times 10^{-6}GA_d^4 + 1.402168 \times 10^{-3}GA_d^3 - 2.008726 \times 10^{-1}GA_d^2 + 9.284121GA_d - 41.25956)}{0.12(-2.278843 \times 10^{-6}GA_d^4 + 1.402168 \times 10^{-3}GA_d^3 - 2.008726 \times 10^{-1}GA_d^2 + 9.284121GA_d - 41.25956)}$$

Where  $GA_d$  = gestational age in days

Equation 3: Percentage weight deviation (Marsal, 2009)

$$weight\ deviation = \frac{(EFW - 50th\ centile\ fetal\ weight\ for\ gestation)}{50th\ centile\ fetal\ weight\ for\ gestation} \times 100$$

Where 50<sup>th</sup> centile fetal weights for gestation are calculated using the formula for Marsal z-score with a z-score of 0.

Equation 4: Intergrowth EFW formula (Stirnemann et al., 2017)

$$\log(EFW) = 5.08482 - 54.06633 \times \left(\frac{AC}{100}\right)^3 - 95.80076 \times \left(\frac{AC}{100}\right)^3 \times \log\left(\frac{AC}{100}\right) + 3.136370 \times \left(\frac{HC}{100}\right)$$

Where AC = abdominal circumference and HC = head circumference. EFW given in grams with measurements in centimetres.



Equation 5: Intergrowth z-score formula (Stirnemann et al., 2017)

$$\begin{aligned}\lambda(GA) &= -4.257629 - 2162.234 \times GA^{-2} + 0.0002301829 \times GA^3 \\ \mu(GA) &= 4.956737 + 0.0005019687 \times GA^3 - 0.0001227065 \times GA^3 \times \log(GA) \\ \sigma(GA) &= 10^{-4} \times (-6.997171 + 0.057559 \times GA^3 - 0.01493946 \times GA^3 \times \log(GA))\end{aligned}$$

If  $\lambda(GA) = 0$

$$z \text{ score} = \sigma(GA)^{-1} \times \log\left(\frac{Y}{\mu(GA)}\right)$$

If  $\lambda(GA) \neq 0$

$$z \text{ score} = (\sigma(GA) \times \lambda(GA))^{-1} \times \left(\left(\frac{Y}{\mu(GA)}\right)^{\lambda(GA)} - 1\right)$$

Where  $\lambda(GA)$  = skewness for given gestational age,  $GA$  = exact gestational age in weeks,  $\mu(GA)$  = mean EFW for given gestational age,  $\sigma(GA)$  = coefficient of variation for given gestational age,  $Y$  =  $\log(\text{EFW})$ , all logs are natural logs.

Table 17: Full list of proteins measured by the Olink Proseek® Multiplex cardiovascular disease (CVD) II proximity extension assay with reported intra-assay variation. Note PIGF is included in the panel, but the PIGF normalised protein expression (NPX) values were not used for our analysis. Instead, we used PIGF concentration, as measured by Elecsys® electrochemiluminescence immunoassays (Roche Diagnostics).

| Protein name (abbreviation)                                                  | UniProt No | Intra-assay variation |
|------------------------------------------------------------------------------|------------|-----------------------|
| Pro-adrenomedullin (ADM)                                                     | P35318     | 13%                   |
| 2,4-dienoyl-CoA reductase, mitochondrial (DECR1)                             | Q16698     | 15%                   |
| A disintegrin and metalloproteinase with thrombospondin motifs 13 (ADAMTS13) | Q76LX8     | 4.0%                  |
| Agouti-related protein (AGRP)                                                | O00253     | 8.6%                  |
| Alpha-L-iduronidase (IDUA)                                                   | P35475     | 6.5%                  |
| Angiopoietin 1 (ANGPT1)                                                      | Q15389     | 8.8%                  |
| Angiopoietin 1 receptor (TIE2)                                               | Q02763     | 7.7%                  |
| Angiotensin-converting enzyme 2 (ACE2)                                       | Q9BYF1     | 7.9%                  |
| Bone morphogenetic protein 6 (BMP6)                                          | P22004     | 21%                   |
| Brother of cysteine dioxygenase (BOC)                                        | Q9BWW1     | 9.6%                  |
| Carbonic anhydrase 5A, mitochondrial (CA5A)                                  | P35218     | 8.8%                  |
| Carcinoembryonic antigen related cell adhesion molecule 8 (CEACAM8)          | P31997     | 11%                   |
| Cathepsin L1 (CTSL1)                                                         | P07711     | 10%                   |
| C-C motif chemokine 17 (CCL17)                                               | Q92583     | 12%                   |
| C-C motif chemokine 3 (CCL3)                                                 | P10147     | 8.6%                  |
| CD40 ligand (CD40L)                                                          | P29965     | 9.1%                  |
| Chymotrypsin C (CTRC)                                                        | Q99895     | 9.8%                  |
| C-X-C motif chemokine 1 (CXCL1)                                              | P09341     | 9.6%                  |
| Decorin (DCN)                                                                | P07585     | 7.5%                  |
| Dickkopf-related protein 1 (DKK1)                                            | O94907     | 11%                   |

|                                                                         |                  |      |
|-------------------------------------------------------------------------|------------------|------|
| Fatty acid-binding protein, intestinal (FABP2)                          | P12104           | 8.5% |
| Fibroblast growth factor 21 (FGF21)                                     | Q9NSA1           | 12%  |
| Fibroblast growth factor 23 (FGF23)                                     | Q9GZV9           | 14%  |
| Follistatin (FST)                                                       | P19883           | 9.3% |
| Galectin 9 (LGALS9)                                                     | O00182           | 5.2% |
| Gastric intrinsic factor (GIF)                                          | P27352           | 11%  |
| Gastrotropin (GT)                                                       | P51161           | 16%  |
| Growth hormone (GH1)                                                    | P01241           | 7.4% |
| Growth/differentiation factor 2 (GDF2)                                  | Q9UK05           | 8.8% |
| Heat shock 27 kDa protein (HSP27)                                       | P04792           | 11%  |
| Heme oxygenase 1 (HO1)                                                  | P09601           | 8.1% |
| Hydroxyacid oxidase 1 (HAO1)                                            | Q9UJM8           | 8.7% |
| Interleukin 1 receptor antagonist protein (IL1RA)                       | P18510           | 12%  |
| Interleukin 1 receptor-like 2 (IL1RL2)                                  | Q9HB29           | 10%  |
| Interleukin 17D (IL17D)                                                 | Q8TAD2           | 13%  |
| Interleukin 18 (IL18)                                                   | Q14116           | 11%  |
| Interleukin 27 (IL27)                                                   | Q8NEV9<br>Q14213 | 7.2% |
| Interleukin 4 receptor subunit alpha (IL4RA)                            | P24394           | 9.2% |
| Interleukin 6 (IL6)                                                     | P05231           | 8.8% |
| Hepatitis A virus cellular receptor 1 (HAVCR1)                          | Q96D42           | 11%  |
| Lactoylglutathione lyase (GLO1)                                         | Q04760           | 8.3% |
| Oxidised low density lipoprotein receptor 1 (OLR1)                      | P78380           | 9.0% |
| Leptin (LEP)                                                            | P41159           | 6.2% |
| Lipoprotein lipase (LPL)                                                | P06858           | 7.2% |
| Low affinity immunoglobulin gamma Fc region receptor II-b (FCGR2B)      | P31994           | 9.1% |
| Lymphotactin (XCL1)                                                     | P47992           | 10%  |
| Macrophage receptor with collagenous structure (MARCO)                  | Q9UEW3           | 6.1% |
| Matrix metalloproteinase 12 (MMP12)                                     | P39900           | 11%  |
| Matrix metalloproteinase 7 (MMP7)                                       | P09237           | 8.5% |
| Melusin (ITGB1BP2)                                                      | Q9UKP3           | 11%  |
| Natriuretic peptides B (BNP)                                            | P16860           | -    |
| Inhibitor of nuclear factor kappa B kinase regulatory subunit G (IKBKG) | Q9Y6K9           | 9.1% |
| Osteoclast-associated immunoglobulin-like receptor (OSCAR)              | Q8IYS5           | 4.9% |
| Pappalysin 1 (PAPPA)                                                    | Q13219           | 13%  |
| Pentraxin-related protein PTX3 (PTX3)                                   | P26022           | 8.1% |
| Placenta growth factor (PlGF)                                           | P49763           | 12%  |
| Platelet-derived growth factor subunit B (PDGFB)                        | P01127           | 11%  |
| Poly [ADP-ribose] polymerase 1 (PARP1)                                  | P09874           | 9.4% |
| Polymeric immunoglobulin receptor (PIGR)                                | P01833           | 3.4% |
| Programmed cell death 1 ligand 2 (PDCD1LG2)                             | Q9BQ51           | 8.7% |
| Heparin binding EGF-like growth factor (HBEGF)                          | Q99075           | 8.4% |
| Pro-interleukin 16 (IL16)                                               | Q14005           | 11%  |
| Prolargin (PRELP)                                                       | P51888           | 6.9% |
| Prostasin (PRSS8)                                                       | Q16651           | 7.6% |
| Protein AMBP (AMBP)                                                     | P02760           | 5.6% |
| Proteinase-activated receptor 1 (PAR1)                                  | P25116           | 9.4% |
| Transglutaminase 2 (TGM2)                                               | P21980           | 8.0% |
| Proto-oncogene tyrosine-protein kinase SRC (SRC)                        | P12931           | 9.7% |
| P-selectin glycoprotein ligand 1 (PSGL1)                                | Q14242           | 5.9% |

|                                                                   |        |      |
|-------------------------------------------------------------------|--------|------|
| Receptor for advanced glycosylation end products (RAGE)           | Q15109 | 8.8% |
| Renin (REN)                                                       | P00797 | 7.8% |
| Serine protease 27 (PRSS27)                                       | Q9BQR3 | 9.3% |
| Serine/threonine-protein kinase 4 (STK4)                          | Q13043 | 7.2% |
| Serpin A12 (SERPINA12)                                            | Q8IW75 | 10%  |
| SLAM family member 5 (CD84)                                       | Q9UIB8 | 9.0% |
| SLAM family member 7 (SLAMF7)                                     | Q9NQ25 | 11%  |
| Sortilin 1 (SORT1)                                                | Q99523 | 7.8% |
| Spondin 2 (SPON2)                                                 | Q9BUD6 | 5.1% |
| Stem cell factor (SCF)                                            | P21583 | 7.3% |
| Superoxide dismutase [Mn], mitochondrial (SOD2)                   | P04179 | 5.9% |
| T-cell surface glycoprotein CD4 (CD4)                             | P01730 | 9.6% |
| Thrombomodulin (TM)                                               | P07204 | 11%  |
| Thrombopoietin (THPO)                                             | P40225 | 9.3% |
| Thrombospondin 2 (THBS2)                                          | P35442 | 5.4% |
| Tissue factor (TF)                                                | P13726 | 8.2% |
| Tumor necrosis factor receptor superfamily member 10B (TNFRSF10B) | O14763 | 10%  |
| Tumor necrosis factor receptor superfamily member 10A (TNFRSF10A) | O00220 | 11%  |
| Tumor necrosis factor receptor superfamily member 11A (TNFRSF11A) | Q9Y6Q6 | 10%  |
| Tumor necrosis factor receptor superfamily member 13B (TNFRSF13B) | O14836 | 9.5% |
| Tyrosine-protein kinase Mer (MERTK)                               | Q12866 | 10%  |
| Vascular endothelial growth factor D (VEGFD)                      | O43915 | 7.2% |
| V-set and immunoglobulin domain-containing protein 2 (VSIG2)      | Q96IQ7 | 8.2% |

Table 18: The scoring system for ranking proteins identified through pooled mass spectrometry, using the following formula:

$$Score = \sum_{i=1}^4 r_i v_i + t + p + u$$

| Category              | Criteria                         | Score |
|-----------------------|----------------------------------|-------|
| Ratio score (r)       | >1.33 or <0.75                   | 5     |
|                       | >1.5 or <0.67                    | 10    |
|                       | >2 or <0.5                       | 15    |
|                       | >4 or <0.25                      | 20    |
| Variability score (v) | >50%                             | 0     |
|                       | 31 to 50%                        | 1     |
|                       | 16 to 30%                        | 1.34  |
|                       | ≤15%                             | 1.50  |
| Trend score (t)       | 2 ratios both >1.2 or both <0.83 | 5     |
|                       | 3 ratios all >1.2 or all <0.83   | 10    |
|                       | 4 ratios all >1.2 or all <0.83   | 20    |
| Peptide score (p)     | 1                                | -50   |
|                       | 2-4                              | 0     |
|                       | ≥5                               | 5     |
| Ubiquity score (u)    | One of the 12 depleted proteins  | -50   |
|                       | Haemoglobin protein              | -20   |

Table 19: Top 50 highest scoring proteins identified from pooled serum liquid chromatography and tandem mass spectrometry, based on the scoring system above.

| UniProt code | Description                                                                                             |
|--------------|---------------------------------------------------------------------------------------------------------|
| P02751       | Fibronectin OS=Homo sapiens GN=FN1 PE=1 SV=4 - [FINC_HUMAN]                                             |
| P02741       | C-reactive protein OS=Homo sapiens GN=CRP PE=1 SV=1 - [CRP_HUMAN]                                       |
| P0DJ19       | Serum amyloid A-2 protein OS=Homo sapiens GN=SAA2 PE=1 SV=1 - [SAA2_HUMAN]                              |
| P20848       | Putative alpha-1-antitrypsin-related protein OS=Homo sapiens GN=SERPINA2P PE=5 SV=1 - [A1ATR_HUMAN]     |
| P0DML2       | Chorionic somatomammotropin hormone 1 OS=Homo sapiens GN=CSH1 PE=1 SV=1 - [CSH1_HUMAN]                  |
| P11464       | Pregnancy-specific beta-1-glycoprotein 1 OS=Homo sapiens GN=PSG1 PE=2 SV=1 - [PSG1_HUMAN]               |
| Q13046       | Putative pregnancy-specific beta-1-glycoprotein 7 OS=Homo sapiens GN=PSG7 PE=5 SV=2 - [PSG7_HUMAN]      |
| Q00887       | Pregnancy-specific beta-1-glycoprotein 9 OS=Homo sapiens GN=PSG9 PE=2 SV=2 - [PSG9_HUMAN]               |
| P01591       | Immunoglobulin J chain OS=Homo sapiens GN=IGJ PE=1 SV=4 - [IGJ_HUMAN]                                   |
| P0DJ18       | Serum amyloid A-1 protein OS=Homo sapiens GN=SAA1 PE=1 SV=1 - [SAA1_HUMAN]                              |
| P01834       | Ig kappa chain C region OS=Homo sapiens GN=IGKC PE=1 SV=1 - [IGKC_HUMAN]                                |
| Q6N069       | N-alpha-acetyltransferase 16, NatA auxiliary subunit OS=Homo sapiens GN=NAA16 PE=1 SV=2 - [NAA16_HUMAN] |
| Q8TDD5       | Mucolin-3 OS=Homo sapiens GN=MCOLN3 PE=1 SV=1 - [MCLN3_HUMAN]                                           |
| Q9UQ72       | Pregnancy-specific beta-1-glycoprotein 11 OS=Homo sapiens GN=PSG11 PE=2 SV=3 - [PSG11_HUMAN]            |
| Q16557       | Pregnancy-specific beta-1-glycoprotein 3 OS=Homo sapiens GN=PSG3 PE=2 SV=2 - [PSG3_HUMAN]               |
| Q00888       | Pregnancy-specific beta-1-glycoprotein 4 OS=Homo sapiens GN=PSG4 PE=2 SV=3 - [PSG4_HUMAN]               |
| P02760       | Protein AMBP OS=Homo sapiens GN=AMBP PE=1 SV=1 - [AMBP_HUMAN]                                           |
| Q9UIQ6       | Leucyl-cystinyl aminopeptidase OS=Homo sapiens GN=LNPEP PE=1 SV=3 - [LCAP_HUMAN]                        |
| P0CG05       | Ig lambda-2 chain C regions OS=Homo sapiens GN=IGLC2 PE=1 SV=1 - [LAC2_HUMAN]                           |
| P55196       | Afadin OS=Homo sapiens GN=MLLT4 PE=1 SV=3 - [AFAD_HUMAN]                                                |
| P04196       | Histidine-rich glycoprotein OS=Homo sapiens GN=HRG PE=1 SV=1 - [HRG_HUMAN]                              |
| P04275       | von Willebrand factor OS=Homo sapiens GN=VWF PE=1 SV=4 - [VWF_HUMAN]                                    |
| Q06033       | Inter-alpha-trypsin inhibitor heavy chain H3 OS=Homo sapiens GN=ITIH3 PE=1 SV=2 - [ITIH3_HUMAN]         |
| Q13219       | Pappalysin-1 OS=Homo sapiens GN=PAPPA PE=1 SV=3 - [PAPP1_HUMAN]                                         |
| O95445       | Apolipoprotein M OS=Homo sapiens GN=APOM PE=1 SV=2 - [APOM_HUMAN]                                       |
| Q9UN37       | Vacuolar protein sorting-associated protein 4A OS=Homo sapiens GN=VPS4A PE=1 SV=1 - [VPS4A_HUMAN]       |
| P11226       | Mannose-binding protein C OS=Homo sapiens GN=MBL2 PE=1 SV=2 - [MBL2_HUMAN]                              |
| O75636       | Ficolin-3 OS=Homo sapiens GN=FCN3 PE=1 SV=2 - [FCN3_HUMAN]                                              |
| P48740       | Mannan-binding lectin serine protease 1 OS=Homo sapiens GN=MASP1 PE=1 SV=3 - [MASP1_HUMAN]              |
| O14791       | Apolipoprotein L1 OS=Homo sapiens GN=APOL1 PE=1 SV=5 - [APOL1_HUMAN]                                    |
| O75882       | Attractin OS=Homo sapiens GN=ATRN PE=1 SV=2 - [ATRN_HUMAN]                                              |

|        |                                                                               |
|--------|-------------------------------------------------------------------------------|
| P00450 | Ceruloplasmin OS=Homo sapiens GN=CP PE=1 SV=1 - [CERU_HUMAN]                  |
| P00734 | Prothrombin OS=Homo sapiens GN=F2 PE=1 SV=2 - [THRB_HUMAN]                    |
| P00736 | Complement C1r subcomponent OS=Homo sapiens GN=C1R PE=1 SV=2 - [C1R_HUMAN]    |
| P00740 | Coagulation factor IX OS=Homo sapiens GN=F9 PE=1 SV=2 - [FA9_HUMAN]           |
| P00742 | Coagulation factor X OS=Homo sapiens GN=F10 PE=1 SV=2 - [FA10_HUMAN]          |
| P00747 | Plasminogen OS=Homo sapiens GN=PLG PE=1 SV=2 - [PLMN_HUMAN]                   |
| P00748 | Coagulation factor XII OS=Homo sapiens GN=F12 PE=1 SV=3 - [FA12_HUMAN]        |
| P00751 | Complement factor B OS=Homo sapiens GN=CFB PE=1 SV=2 - [CFAB_HUMAN]           |
| P01008 | Antithrombin-III OS=Homo sapiens GN=SERPINC1 PE=1 SV=1 - [ANT3_HUMAN]         |
| P01011 | Alpha-1-antichymotrypsin OS=Homo sapiens GN=SERPINA3 PE=1 SV=2 - [AACT_HUMAN] |
| P01019 | Angiotensinogen OS=Homo sapiens GN=AGT PE=1 SV=1 - [ANGT_HUMAN]               |
| P01024 | Complement C3 OS=Homo sapiens GN=C3 PE=1 SV=2 - [CO3_HUMAN]                   |
| P01031 | Complement C5 OS=Homo sapiens GN=C5 PE=1 SV=4 - [CO5_HUMAN]                   |
| P01042 | Kininogen-1 OS=Homo sapiens GN=KNG1 PE=1 SV=2 - [KNG1_HUMAN]                  |
| P02649 | Apolipoprotein E OS=Homo sapiens GN=APOE PE=1 SV=1 - [APOE_HUMAN]             |
| P02654 | Apolipoprotein C-I OS=Homo sapiens GN=APOC1 PE=1 SV=1 - [APOC1_HUMAN]         |
| P02655 | Apolipoprotein C-II OS=Homo sapiens GN=APOC2 PE=1 SV=1 - [APOC2_HUMAN]        |
| P02656 | Apolipoprotein C-III OS=Homo sapiens GN=APOC3 PE=1 SV=1 - [APOC3_HUMAN]       |
| P02743 | Serum amyloid P-component OS=Homo sapiens GN=APCS PE=1 SV=2 - [SAMP_HUMAN]    |

Table 20: Combinations of proteins included in different sections of the study

| Platform        | Protein(s)                    | Tested in discovery set | Univariate association with outcomes in discovery set | Model generation from discovery set | Parental network analysis | Tested in validation set | Univariate association with outcomes in combined set |
|-----------------|-------------------------------|-------------------------|-------------------------------------------------------|-------------------------------------|---------------------------|--------------------------|------------------------------------------------------|
| Roche Elecsys   | PIGF & sFLT1                  | ✓                       | ✓                                                     | ✓                                   | ✓                         | ✓                        | ✓                                                    |
| ELISA           | VEGFA                         | ✓                       |                                                       |                                     | ✓                         |                          |                                                      |
|                 | VEGFD, endoglin, NRP1, VEGFR2 | ✓                       | ✓                                                     | ✓                                   | ✓                         |                          |                                                      |
|                 | FN, CSH, PSG1                 | ✓                       | ✓                                                     | ✓                                   | ✓                         | ✓                        | ✓                                                    |
|                 | LNPEP & SAA                   | ✓                       | ✓                                                     | ✓                                   | ✓                         |                          |                                                      |
| Olink multiplex | PIGF                          | ✓                       |                                                       |                                     |                           | ✓                        |                                                      |
|                 | VEGFD                         | ✓                       |                                                       |                                     |                           | ✓                        | ✓                                                    |
|                 | BNP, melusin, PARP1           | ✓                       |                                                       |                                     | ✓                         | ✓                        |                                                      |
|                 | Remaining 87 proteins         | ✓                       | ✓                                                     | ✓                                   | ✓                         | ✓                        | ✓                                                    |
| Totals          |                               |                         | 98                                                    | 98                                  | 102                       |                          | 93                                                   |

Table 21: Marker priority survey questions for clinicians and patients. Importance was ranked on the following 5-point Likert scale: very important; important; moderately important; slightly important; not important.

| Stakeholder | Question area                                      | Full question wording                                                                                                                                                                                                                    |
|-------------|----------------------------------------------------|------------------------------------------------------------------------------------------------------------------------------------------------------------------------------------------------------------------------------------------|
| Clinicians  | Importance of outcomes for providing clinical care | How important is predicting which pregnancies will end in fetal or neonatal death for providing clinical care?                                                                                                                           |
|             |                                                    | When providing clinical care, which is more important: correctly identifying women who WILL have this outcome (true positives, sensitivity) or correctly identifying women who will NOT have this outcome (true negatives, specificity)? |
|             |                                                    | How important is predicting which pregnancies will end in fetal death or the need for delivery before 28 weeks of gestation for providing clinical care?                                                                                 |
|             |                                                    | When providing clinical care, which is more important: correctly identifying women who WILL have this outcome (true positives, sensitivity) or correctly identifying women who will NOT have this outcome (true negatives, specificity)? |
|             |                                                    | How important is predicting that umbilical artery Dopplers would become abnormal (pulsatility index >95 <sup>th</sup> centile) if they were normal at the time of diagnosis for providing clinical care?                                 |
|             |                                                    | When providing clinical care, which is more important: correctly identifying women who WILL have this outcome (true positives, sensitivity) or correctly identifying women who will NOT have this outcome (true negatives, specificity)? |
|             |                                                    | How important is predicting which pregnancies will end in a live birth at 37+0 or later for providing clinical care?                                                                                                                     |
|             |                                                    | When providing clinical care, which is more important: correctly identifying women who WILL have this outcome (true positives, sensitivity) or correctly identifying women who will NOT have this outcome (true negatives, specificity)? |
|             | Importance of outcomes for patient counselling     | How important is predicting which pregnancies will end in fetal or neonatal death for patient counselling?                                                                                                                               |
|             |                                                    | When counselling patient, which is more important: correctly identifying women who WILL have this outcome (true positives, sensitivity) or correctly identifying women who will NOT have this outcome (true negatives, specificity)?     |
|             |                                                    | How important is predicting which pregnancies will end in fetal death or the need for delivery before 28 weeks of gestation for patient counselling?                                                                                     |
|             |                                                    | When counselling patient, which is more important: correctly identifying women who WILL have this outcome (true positives, sensitivity) or correctly identifying women who will NOT have this outcome (true negatives, specificity)?     |
|             |                                                    | How important is predicting that umbilical artery Dopplers would become abnormal (pulsatility index >95 <sup>th</sup> centile) if they were normal at the time of diagnosis for patient counselling?                                     |
|             |                                                    | When counselling patient, which is more important: correctly identifying women who WILL have this outcome (true positives, sensitivity) or correctly identifying women who will NOT have this outcome (true negatives, specificity)?     |
|             |                                                    | How important is predicting which pregnancies will end in a live birth at 37+0 or later for patient counselling?                                                                                                                         |
|             |                                                    | When counselling patient, which is more important: correctly identifying women who WILL have this outcome (true positives, sensitivity) or correctly identifying women who will NOT have this outcome (true negatives, specificity)?     |

| Stakeholder                                                                                                                                                                                                | Full question wording                                                                                                                                                                                                                                                                                                                                                                                                                                                                                                                                    |
|------------------------------------------------------------------------------------------------------------------------------------------------------------------------------------------------------------|----------------------------------------------------------------------------------------------------------------------------------------------------------------------------------------------------------------------------------------------------------------------------------------------------------------------------------------------------------------------------------------------------------------------------------------------------------------------------------------------------------------------------------------------------------|
| Patients                                                                                                                                                                                                   | How important is it to be able to predict whether the pregnancy will end in the death of the baby, either inside the womb or after birth (fetal or neonatal death)?                                                                                                                                                                                                                                                                                                                                                                                      |
|                                                                                                                                                                                                            | Which is more important: correctly identifying women who WILL have this outcome (true positives, sensitivity) or correctly identifying women who will NOT have this outcome (true negatives, specificity)?                                                                                                                                                                                                                                                                                                                                               |
|                                                                                                                                                                                                            | How important is it to be able to predict whether the pregnancy will end in the death of the baby inside the womb (fetal death) or such serious concerns about the baby's wellbeing that it would need to be delivered extremely prematurely (before 28 weeks of gestation i.e. 3 months prematurely)?                                                                                                                                                                                                                                                   |
|                                                                                                                                                                                                            | Which is more important: correctly identifying women who WILL have this outcome (true positives, sensitivity) or correctly identifying women who will NOT have this outcome (true negatives, specificity)?                                                                                                                                                                                                                                                                                                                                               |
|                                                                                                                                                                                                            | How important is it to be able to predict whether the blood flow measurements in the umbilical cord (umbilical artery Dopplers) will become abnormal if they were normal at first?                                                                                                                                                                                                                                                                                                                                                                       |
|                                                                                                                                                                                                            | Note: The umbilical arteries take blood from the baby back to the placenta. We use Doppler ultrasound to measure the something called the 'pulsatility index' in the umbilical arteries. When this is higher than normal it suggests there is a problem with how the placenta has developed and/or how the placenta is working. If umbilical artery Dopplers are normal the baby may just be 'constitutionally' small but if the umbilical artery Dopplers are abnormal it is more likely that the baby is small because of a problem with the placenta. |
|                                                                                                                                                                                                            | Which is more important: correctly identifying women who WILL have this outcome (true positives, sensitivity) or correctly identifying women who will NOT have this outcome (true negatives, specificity)?                                                                                                                                                                                                                                                                                                                                               |
|                                                                                                                                                                                                            | How important is it to be able to predict whether the pregnancy will end in the live birth of the baby at term (37 weeks of pregnancy or more)?                                                                                                                                                                                                                                                                                                                                                                                                          |
| Which is more important: correctly identifying women who WILL have this outcome (true positives, sensitivity) or correctly identifying women who will NOT have this outcome (true negatives, specificity)? |                                                                                                                                                                                                                                                                                                                                                                                                                                                                                                                                                          |



## References

- HADLOCK, F. P., HARRIST, R. B., SHARMAN, R. S., DETER, R. L. & PARK, S. K. 1985. Estimation of fetal weight with the use of head, body, and femur measurements--a prospective study. *Am J Obstet Gynecol*, 151, 333-7.
- KHONG, T. Y., MOONEY, E. E., ARIEL, I., BALMUS, N. C., BOYD, T. K., BRUNDLER, M. A., DERRICOTT, H., EVANS, M. J., FAYE-PETERSEN, O. M., GILLAN, J. E., HEAZELL, A. E., HELLER, D. S., JACQUES, S. M., KEATING, S., KELEHAN, P., MAES, A., MCKAY, E. M., MORGAN, T. K., NIKKELS, P. G., PARKS, W. T., REDLINE, R. W., SCHEIMBERG, I., SCHOOTS, M. H., SEBIRE, N. J., TIMMER, A., TUROWSKI, G., VAN DER VOORN, J. P., VAN LIJNSCHOTEN, I. & GORDIJN, S. J. 2016. Sampling and Definitions of Placental Lesions: Amsterdam Placental Workshop Group Consensus Statement. *Arch Pathol Lab Med*, 140, 698-713.
- MARSAL, K. 2009. Obstetric management of intrauterine growth restriction. *Best Practice & Research Clinical Obstetrics and Gynaecology*, 23, 857-870.
- MARSAL, K., PERSSON, P. H., LARSEN, T., LILJA, H., SELBING, A. & SULTAN, B. 1996. Intrauterine growth curves based on ultrasonically estimated foetal weights. *Acta Paediatr*, 85, 843-8.
- SCHAFFER, A. C. & STAUDACH, A. 1997. *RE: Doppler-Referenzkurven*.
- STIRNEMANN, J., VILLAR, J., SALOMON, L. J., OHUMA, E., RUYAN, P., ALTMAN, D. G., NOSTEN, F., CRAIK, R., MUNIM, S., CHEIKH ISMAIL, L., BARROS, F. C., LAMBERT, A., NORRIS, S., CARVALHO, M., JAFFER, Y. A., NOBLE, J. A., BERTINO, E., GRAVETT, M. G., PURWAR, M., VICTORA, C. G., UAUY, R., BHUTTA, Z., KENNEDY, S. & PAPAGEORGHIU, A. T. 2017. International estimated fetal weight standards of the INTERGROWTH-21st Project. *Ultrasound Obstet Gynecol*, 49, 478-486.
